# Supplementary material for: Determinants of inappropriate admission of elderly people in county-level hospitals: a cross-sectional study in rural China
Source: PubMed Central journal article supplement — BMJ Open. 2019 May 1;9(4):e026443. doi: 10.1136/bmjopen-2018-026443 (PMC6502026; doi:10.1136/bmjopen-2018-026443), 2019-05-01
Supplement: bmjopen-2018-026443.draft_revisions.pdf [file bmjopen-2018-026443.draft_revisions.pdf]

# BMJ Open

BMJ Open is committed to open peer review. As part of this commitment we make the peer review history of every article we publish publicly available.

When an article is published we post the peer reviewers' comments and the authors' responses online. We also post the versions of the paper that were used during peer review. These are the versions that the peer review comments apply to.

The versions of the paper that follow are the versions that were submitted during the peer review process. They are not the versions of record or the final published versions. They should not be cited or distributed as the published version of this manuscript.

BMJ Open is an open access journal and the full, final, typeset and author-corrected version of record of the manuscript is available on our site with no access controls, subscription charges or pay-per-view fees (<http://bmjopen.bmj.com>).

If you have any questions on BMJ Open's open peer review process please email [editorial.bmjopen@bmj.com](mailto:editorial.bmjopen@bmj.com)

# BMJ Open

## Determinants of Inappropriate Admission of Elderly People in County-Level Hospitals: A Cross-Sectional Study in Rural China

|                               |                                                                                                                                                                                                                                                                                                                                                                                                                                                                                                                                                                                                                                                                                                                                                                                                                                                                                                                                                                                                                                                                                                                                                                                                                                                                                                                                                                                                                                                                                                                                                                                                                                                                                                                                                                                                                                                                                                                                                                                                                                                                                                                                                                                                                                                                                                                                                              |
|-------------------------------|--------------------------------------------------------------------------------------------------------------------------------------------------------------------------------------------------------------------------------------------------------------------------------------------------------------------------------------------------------------------------------------------------------------------------------------------------------------------------------------------------------------------------------------------------------------------------------------------------------------------------------------------------------------------------------------------------------------------------------------------------------------------------------------------------------------------------------------------------------------------------------------------------------------------------------------------------------------------------------------------------------------------------------------------------------------------------------------------------------------------------------------------------------------------------------------------------------------------------------------------------------------------------------------------------------------------------------------------------------------------------------------------------------------------------------------------------------------------------------------------------------------------------------------------------------------------------------------------------------------------------------------------------------------------------------------------------------------------------------------------------------------------------------------------------------------------------------------------------------------------------------------------------------------------------------------------------------------------------------------------------------------------------------------------------------------------------------------------------------------------------------------------------------------------------------------------------------------------------------------------------------------------------------------------------------------------------------------------------------------|
| Journal:                      | <i>BMJ Open</i>                                                                                                                                                                                                                                                                                                                                                                                                                                                                                                                                                                                                                                                                                                                                                                                                                                                                                                                                                                                                                                                                                                                                                                                                                                                                                                                                                                                                                                                                                                                                                                                                                                                                                                                                                                                                                                                                                                                                                                                                                                                                                                                                                                                                                                                                                                                                              |
| Manuscript ID                 | bmjopen-2018-026443                                                                                                                                                                                                                                                                                                                                                                                                                                                                                                                                                                                                                                                                                                                                                                                                                                                                                                                                                                                                                                                                                                                                                                                                                                                                                                                                                                                                                                                                                                                                                                                                                                                                                                                                                                                                                                                                                                                                                                                                                                                                                                                                                                                                                                                                                                                                          |
| Article Type:                 | Research                                                                                                                                                                                                                                                                                                                                                                                                                                                                                                                                                                                                                                                                                                                                                                                                                                                                                                                                                                                                                                                                                                                                                                                                                                                                                                                                                                                                                                                                                                                                                                                                                                                                                                                                                                                                                                                                                                                                                                                                                                                                                                                                                                                                                                                                                                                                                     |
| Date Submitted by the Author: | 07-Sep-2018                                                                                                                                                                                                                                                                                                                                                                                                                                                                                                                                                                                                                                                                                                                                                                                                                                                                                                                                                                                                                                                                                                                                                                                                                                                                                                                                                                                                                                                                                                                                                                                                                                                                                                                                                                                                                                                                                                                                                                                                                                                                                                                                                                                                                                                                                                                                                  |
| Complete List of Authors:     | <p>Hu, Xiaomei; School of Medicine and Health Management, Tongji Medical College, Huazhong University of Science and Technology; Research Center for Rural Health Service, Key Research Institute of Humanities &amp; Social Sciences of Hubei Province</p> <p>Gao, Hongxia; School of Medicine and Health Management, Tongji Medical College, Huazhong University of Science and Technology; Research Center for Rural Health Service, Key Research Institute of Humanities &amp; Social Sciences of Hubei Province</p> <p>Zhang, Yan; School of Medicine and Health Management, Tongji Medical College, Huazhong University of Science and Technology; Research Center for Rural Health Service, Key Research Institute of Humanities &amp; Social Sciences of Hubei Province</p> <p>Li, Haomiao; School of Medicine and Health Management, Tongji Medical College, Huazhong University of Science and Technology; Research Center for Rural Health Service, Key Research Institute of Humanities &amp; Social Sciences of Hubei Province</p> <p>Su, Dai; School of Medicine and Health Management, Tongji Medical College, Huazhong University of Science and Technology; Research Center for Rural Health Service, Key Research Institute of Humanities &amp; Social Sciences of Hubei Province</p> <p>Chang, Jingjing; School of Medicine and Health Management, Tongji Medical College, Huazhong University of Science and Technology; Research Center for Rural Health Service, Key Research Institute of Humanities &amp; Social Sciences of Hubei Province</p> <p>Jiang, Di; School of Medicine and Health Management, Tongji Medical College, Huazhong University of Science and Technology; Research Center for Rural Health Service, Key Research Institute of Humanities &amp; Social Sciences of Hubei Province</p> <p>Lei, Shihan; School of Medicine and Health Management, Tongji Medical College, Huazhong University of Science and Technology; Research Center for Rural Health Service, Key Research Institute of Humanities &amp; Social Sciences of Hubei Province</p> <p>Chen, Yingchun; School of Medicine and Health Management, Tongji Medical College, Huazhong University of Science and Technology; Research Center for Rural Health Service, Key Research Institute of Humanities &amp; Social Sciences of Hubei Province</p> |
| Keywords:                     | Health policy < HEALTH SERVICES ADMINISTRATION & MANAGEMENT, Quality in health care < HEALTH SERVICES ADMINISTRATION & MANAGEMENT, Health economics < HEALTH SERVICES ADMINISTRATION                                                                                                                                                                                                                                                                                                                                                                                                                                                                                                                                                                                                                                                                                                                                                                                                                                                                                                                                                                                                                                                                                                                                                                                                                                                                                                                                                                                                                                                                                                                                                                                                                                                                                                                                                                                                                                                                                                                                                                                                                                                                                                                                                                         |

1  
2  
3  
4  
5  
6  
7  
8  
9  
10  
11  
12  
13  
14  
15  
16  
17  
18  
19  
20  
21  
22  
23  
24  
25  
26  
27  
28  
29  
30  
31  
32  
33  
34  
35  
36  
37  
38  
39  
40  
41  
42  
43  
44  
45  
46  
47  
48  
49  
50  
51  
52  
53  
54  
55  
56  
57  
58  
59  
60

|  |              |
|--|--------------|
|  | & MANAGEMENT |
|  |              |

SCHOLARONE™  
Manuscripts

For peer review only

1 **Determinants of Inappropriate Admission of Elderly People in**  
 2 **County-Level Hospitals: A Cross-Sectional Study in the Rural China**

3 Xiaomei Hu<sup>1,2+</sup>, Hongxia Gao<sup>1,2+</sup>, Yan Zhang<sup>1,2</sup>, Haomiao Li<sup>1,2</sup>, Dai Su<sup>1,2</sup>,  
 4 Jingjing Chang<sup>1,2</sup>, Di Jiang<sup>1,2</sup>, Shihan Lei<sup>1,2</sup>, Yingchun Chen<sup>1,2</sup> §

5  
 6 <sup>1</sup> School of Medicine and Health Management, Tongji Medical College, Huazhong  
 7 University of Science and Technology, Wuhan, Hubei, 430030, China

8 <sup>2</sup> Research Centre for Rural Health Service, Key Research Institute of Humanities &  
 9 Social Sciences of Hubei Provincial Department of Education, Wuhan, Hubei, 430030,  
 10 China

11  
 12 **Email addresses:**

|    |        |                |       |                           |
|----|--------|----------------|-------|---------------------------|
| 13 | X-M.H. | Xiaomei Hu     | M.D.  | huxiaomei@hust.edu.cn     |
| 14 | H-X.G. | Hongxia Gao    | Ph.D. | gaohongxia@hust.edu.cn    |
| 15 | Y.Z    | Yan Zhang      | Ph.D. | yanzhang@hust.edu.cn      |
| 16 | H-M.L  | Haomiao Li     | Ph.D. | lihaomiao@hust.edu.cn     |
| 17 | D.S.   | Dai Su         | Ph.D. | sudai@hust.edu.cn         |
| 18 | J-J.C. | Jingjing Chang | Ph.D. | changjingjing@hust.edu.cn |
| 19 | D-J    | Di Jiang       | M.D.  | jiangdi@hust.edu.cn       |
| 20 | S-H.L. | Shihan Lei     | M.D.  | leishihan@hust.edu.cn     |
| 21 | Y-C.C. | Yingchun Chen  | Ph.D. | chenyingchun@hust.edu.cn  |

1  
2  
3  
4  
5  
6  
7  
8  
9  
10  
11  
12  
13  
14  
15  
16  
17  
18  
19  
20  
21  
22 **\*Equal contributors:**

23 X-M.H and H-X.G contributed equally to the development of this research study.

24 **§Corresponding author:**

25 Yingchun Chen, chenyingchun@hust.edu.cn

26 **Abstract**

27 **Objective** The purpose of this paper is to investigate the characteristics and  
28 determinants of inappropriate admission to hospital of elderly people in rural China.

29 **Design** A cross-sectional study was conducted, wherein a comparison between elderly  
30 and non-elderly groups was conducted.

31 **Setting** The survey was conducted on the largest county-level general hospitals in  
32 four counties in central and western China.

33 **Participants** A total of 652 rural patients admitted in hospitals were surveyed, of  
34 which 230 were elderly patients who were over 60 years old and 422 non-elderly  
35 patients who were under 60 years old.

36 **Primary measures** The Chinese version of the appropriateness evaluation protocol  
37 was used to evaluate the inappropriate admission rates. The interactive regression  
38 models based on the relationship of age (elderly and non-elderly) with other factors  
39 and binary logistic regression models were used in the analysis of the specific factors  
40 and determinants of the inappropriate admission of elderly people.

41 **Result** The inappropriate admission rate for rural elderly was 30%, which was lower  
42 than that of non-elderly people (40.8%). Compared with the non-elderly group,

1  
2  
3  
4 43 women in the elderly group (OR=0.33) had a lower incidence of inappropriate  
5  
6 44 admission, and elderly people with chronic diseases (OR=3.33) were more prone to  
7  
8 45 inappropriately admitted than non-elderly people with chronic diseases. The binary  
9  
10 46 logistic regression analysis shows that county, gender (OR=0.49), age (OR=0.94),  
11  
12 47 department and response to doctor's admission request are the determinants of the  
13  
14 48 inappropriate admission of elderly patients.

15  
16  
17  
18 49 **Conclusion** The inappropriate admission rate of elderly people in this study is higher  
19  
20 50 than that reported by other studies. We found that gender and chronic disease are the  
21  
22 51 specific factors that are specific to non-elderly people. County, gender, age,  
23  
24 52 department and response to a doctor's admission request have substantial influence on  
25  
26 53 the inappropriate admission of elderly in rural China.

### 54 **Strengths and limitation of this study**

- 55 1. To the best of our knowledge, this is the first in-depth study of the inappropriate  
56 admission of elderly people in rural areas in China.
- 57 2. The inclusion of non-elderly people for comparative analysis emphasised the  
58 specificity of the inappropriate hospital admission of elderly people.
- 59 3. In the search for determinants of inappropriate admission to the elderly, social  
60 demographics, objective admission status and subjective cognitive status were all  
61 included.
- 62 4. This cross-sectional study design cannot determine the causal relationship  
63 between the inappropriate hospital admission of elderly people and related factors.

1  
2  
3  
4 64 5. The appropriateness evaluation protocol applicable to the entire population may  
5  
6 65 not be the best tool for evaluating the inappropriate admission of elderly people.  
7  
8

## 66 **Introduction**

67 Aging is a severe challenge facing the Chinese society today. At the end of 2017,  
68 China's elderly population aged 60 years and above was 241 million, accounting for  
69 17.3% of the total population <sup>[1]</sup>. In recent years, the utilization of health services for  
70 rural elderly population in China has increased sharply. The rate of hospitalization for  
71 the elderly has increased from 12.7% in 2003 to 21.5% in 2013 <sup>[2]</sup>. The high  
72 hospitalization rate of the elderly in rural areas suggests the inappropriate use of  
73 elderly hospitalization services <sup>[3]</sup>, and the inappropriate admission rate of people over  
74 60 years in rural areas in China has reached 23.2% <sup>[4]</sup>. The rationality of the elderly's  
75 health demand has become a major concern in the supply of health services in China.  
76 Inappropriate admission refers to the unnecessary hospitalization of patients <sup>[5,6]</sup>,  
77 which is one of the main forms of excessive demand for hospitalization services <sup>[7]</sup>.  
78 Some special national conditions in China determine that the reason for the  
79 inappropriate admission of elderly people in rural areas in China differs from that in  
80 other countries. On the one hand, primary health care is backward in rural areas in  
81 China, especially family doctor system, which remains far from perfect. Hence,  
82 patients lack the correct guidance for their first visit. The cognitive levels of elderly  
83 patients age decrease with age <sup>[8]</sup>. This condition makes them prone to cognitive  
84 deviation and affects the rationality of their hospitalization behaviours. On the other

1  
2  
3 85 hand, China's institutional endowment system remains imperfect, and hospitalization  
4  
5  
6 86 services have become the main sources of nursing services for the elderly. Elderly  
7  
8 87 people frequently suffer from chronic diseases and poor health, and thus urgently  
9  
10  
11 88 require nursing services<sup>[9]</sup>. The appropriateness of hospitalization behaviour for the  
12  
13  
14 89 purpose of obtaining nursing services is also affected.  
15  
16 90 In recent years, the Chinese government has adopted various reform measures that are  
17  
18 91 aimed at guiding patients seeking correct medical care; these measures include the  
19  
20  
21 92 implementation of basic medical insurance payment reform<sup>[10]</sup>, hierarchical medical  
22  
23  
24 93 system and family doctor contracted services. However, inappropriate inpatient  
25  
26 94 service utilization for the elderly remains a problem in rural areas in China. The main  
27  
28 95 reason is that the determinants of the inappropriate admission of elderly people to  
29  
30  
31 96 hospitals in these areas have not been clearly defined.  
32  
33 97 Inappropriate admission not only wastes health resources but also further increases the  
34  
35  
36 98 economic burden of the elderly in rural areas. It also increases the risk of  
37  
38 99 hospital-acquired infections in elderly people, thereby compromising patient safety  
39  
40  
41 100 and health<sup>[11,12]</sup>. Therefore, identifying the determinants of inappropriate  
42  
43  
44 101 hospitalization is a useful approach for the formulation of targeted interventions that  
45  
46 102 can reduce inappropriate hospital admission rates and improve the efficiencies and  
47  
48 103 qualities of hospitalization services.  
49  
50  
51 104 The international study on the inappropriate admission of the elderly is mainly  
52  
53  
54 105 focused on the evaluation of the rate, characteristics and impact factors of  
55  
56 106 inappropriate admission in hospitals. Influencing factors are mainly considered from



1  
2  
3 107 the perspective of individual characteristics and supplier side. The analysis of  
4  
5  
6 108 individual characteristics generally focuses on diseases and severity of illness in  
7  
8 109 hospitalised elderly patients. Gamper et al. <sup>[13]</sup> found that elderly people with chronic  
9  
10  
11 110 diseases are more likely to be inappropriately admitted. Menand et al. <sup>[14]</sup> found that  
12  
13 111 the severity of illness and mention of a cardiac disease are associated with the  
14  
15  
16 112 inappropriate admission of people aged 80 years. The analysis of influencing factors  
17  
18 113 from the supplier side mainly focuses on the decision-making of medical service  
19  
20  
21 114 providers and primary health care. Aida et al. <sup>[15]</sup> showed that the inappropriate  
22  
23 115 admission of elderly people over 65 years old in southern Italy is mainly influenced  
24  
25  
26 116 by conservative admission treatment decision, which is made by doctors or hospital  
27  
28 117 managers to avoid the risk of medical accidents. Mytton et al. <sup>[16]</sup> found that, in the  
29  
30  
31 118 United Kingdom, the inappropriate admission of elderly people to the emergency  
32  
33 119 departments of hospitals depends on the quality of doctor admission decisions and the  
34  
35  
36 120 capacities of community health services.

37  
38 121 The perceptions of elderly people about diseases, hospitalization cost, compliance  
39  
40  
41 122 with doctors' admission requirements and other aspects are rarely included in the  
42  
43 123 analysis of influencing factors, and the comprehensive consideration of both supply  
44  
45  
46 124 and demand factors are often undermined in most studies. Presently, although the  
47  
48 125 inappropriate admission of the elderly in rural areas in China has been studied <sup>[4]</sup>, the  
49  
50  
51 126 analysis only covered the descriptive analysis phase, and the effect of the factors  
52  
53 127 remains unclear. Thus, the factors affecting the inappropriate admission of elderly in  
54  
55  
56 128 rural areas in China should be further discussed. Based on China's special national

1  
2  
3 129 conditions, we assume that the subjective perception bias of the elderly is the key  
4  
5  
6 130 factor of their inappropriate admission. Therefore, by identifying the rate of  
7  
8  
9 131 inappropriate admission of rural elderly in China, we studied the determinants of  
10  
11 132 inappropriate admission of elderly people.  
12  
13 133 This study aims to identify the determinants of inappropriate admission of elderly  
14  
15 134 people to hospitals in the rural areas of China from the perspective of supply and  
16  
17  
18 135 demand and to provide targeted strategies for the intervention and control of the  
19  
20  
21 136 hospitalization behaviours of elderly people.  
22  
23

## 24 137 **Methods**

### 25 26 27 138 **Setting and participants**

28  
29 139 This cross-sectional study was conducted in 2017, and cluster random sampling was  
30  
31 140 adopted. Four counties in central and western China, namely, Dingyuan in Anhui  
32  
33 141 Province, Huining and Weiyuan in Gansu Province and Yilong in Sichuan Province,  
34  
35  
36 142 were selected as sample counties (Fig. 1). The counties in eastern China were not  
37  
38  
39 143 included because most counties are shifting to the urban district level through rapid  
40  
41 144 economic and social development. The largest county-level general hospital in each  
42  
43 145 county was surveyed, and the respondents were hospitalised patients in rural  
44  
45  
46 146 households who were grouped into the elderly group (aged 60 years and older) and  
47  
48  
49 147 non-elderly groups (under 60 years old).  
50  
51  
52  
53  
54  
55  
56  
57  
58  
59  
60

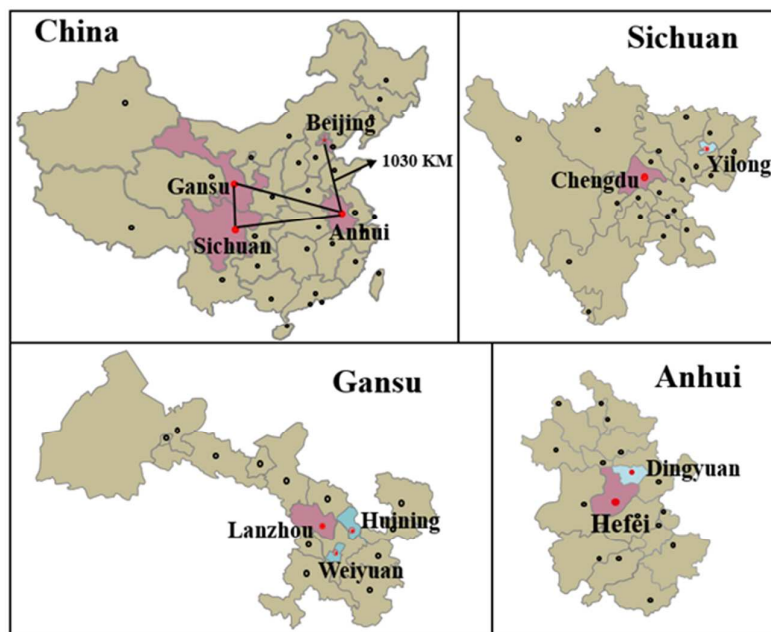

148

149

[Figure 1]

150 We believe that the differentiated compensation for the New Rural Cooperative  
 151 Medical System (NRCMS) in different regions may have an influence on the  
 152 inappropriate admission of elderly people to hospitals. All participants are covered by  
 153 NRCMS, and the reimbursement policies in the four counties were similar,  
 154 particularly those regarding the reimbursement of outpatient and inpatient. The  
 155 NRCMS reimbursement policies in the survey areas are shown in Table 1.

156 **Table 1** NRCMS reimbursement policies in the survey areas in 2017

| County   | R <sub>0</sub>     |          | R <sub>1</sub>     |     |         |                  |     |         | APL(RMB) |
|----------|--------------------|----------|--------------------|-----|---------|------------------|-----|---------|----------|
|          | township hospitals |          | township hospitals |     |         | county hospitals |     |         |          |
|          | RR                 | APL(RMB) | Deductible         | RR  | PL(RMB) | Deductible       | RR  | PL(RMB) |          |
| Yilong   | 60%                | 120      | 100                | 90% | -       | 400              | 75% | -       | 180000   |
| Huining  | 60%                | 300      | 150                | 90% | 3000    | 500              | 85% | 20000   | 80000    |
| Dingyuan | 45%                | 150      | 150                | 90% | -       | 620              | 85% | -       | 200000   |
| Weiyuan  | 90%                | 110      | 150                | 80% | 3000    | 500              | 70% | 15000   | 80000    |

157 Note: R<sub>0</sub>, Reimbursement of Outpatient; R<sub>1</sub>, Reimbursement of Inpatient.

158 RR, Reimbursement ratio; APL, Annual payment limitation; PL, payment limitation of each time.

157

### 158 **Sampling and data collection**

159 For the calculation of sample size, it is estimated that the inappropriate admission rate  
160  $P$  of in rural areas is 25%, the absolute tolerance  $\delta=0.035$  and the confidence level is  
161 95% ( $\alpha=0.05$ ):

$$162 N = Z_{\alpha/2}^2 \times P(1 - P) / \delta^2 = 1.96^2 \times 0.25 \times (1 - 0.25) / 0.035^2 = 588$$

163 Through a cluster sampling method, 170 rural patients in each county hospital were  
164 randomly selected. The responses were obtained through the use of questionnaire  
165 surveys, and their medical records were collected after they were discharged. To  
166 ensure the integrity of the data for each indicator, we excluded the unqualified sample  
167 records. Of the 680 records collected, 652 valid records were finally retained,  
168 including 230 for the elderly and 422 for the non-elderly.

### 169 **Measurement**

170 With the consent of the hospital and the patients, a structured questionnaire survey  
171 was used, which included inquiries about demographic characteristics and subjective  
172 cognitive indicators. Their medical records were extracted for the collection of  
173 objective admission statuses and evaluation of the appropriateness of admission.

### 174 **Records appropriateness evaluation**

175 The appropriateness evaluation protocol (AEP)<sup>[17]</sup> is widely used in the evaluation of  
176 the appropriateness of admission. Yingchun<sup>[18]</sup> developed an identification tool,  
177 R-AEP, that is suitable for the appropriateness of admission to hospitals operating in  
178 rural areas in China. The tool is based on the existing international AEP and provides  
179 a methodological basis of evaluation.

1  
2  
3  
4 180 The R-AEP criteria were used in the evaluation of the appropriateness of admission in  
5  
6 181 652 cases. The evaluation was performed by professionally trained personnel. The  
7  
8 182 R-AEP criteria are based on the value of the medical record. Therefore, all R-AEP  
9  
10  
11 183 related indicators were extracted, and their actual values were compared with standard  
12  
13 184 values. The record for indicator actual values that match with the standard value was  
14  
15  
16 185 considered appropriate. Medical records with all relevant values that did not meet the  
17  
18 186 AEP criteria were considered as inappropriate admission.

### 187 **Variables**

188 The outcome variable was the appropriateness of admission to the hospital, with  
19  
20  
21  
22  
23  
24 188 The outcome variable was the appropriateness of admission to the hospital, with  
25  
26 189 appropriate admission = 0 and inappropriate admission = 1.

27  
28 190 The independent variables mainly include demographic characteristics (e.g., county,  
29  
30  
31 191 gender and age), subjective cognitive status (e.g., response to doctor's admission  
32  
33 192 request (RTDAR), disease severity, affordability to hospitalization costs, comparison  
34  
35  
36 193 of inpatient and outpatient reimbursement( CORR ) and hospitalization convenience)  
37  
38 194 and objective admission status (e.g., department, disease, health status and diagnosis  
39  
40  
41 195 of chronic diseases (DOCD))

### 196 **Statistics analysis**

42  
43  
44  
45  
46 197 The demographic characteristics, subjective cognitive status and objective admission  
47  
48 198 status were processed via Epidata 3.2. Diseases were categorised using the  
49  
50  
51 199 International Classification of Diseases 10th revision (ICD-10).

52  
53 200 IBM SPSS Statistics 22.0 was used for statistical analysis. The *t* test and Person's  
54  
55  
56 201 chi-square test were used in the analysis of the distribution characteristics of

1  
2  
3  
4 202 inappropriate admission of the elderly. For the 652 respondents, the interactive  
5  
6 203 logistic regression model based on the relationship of age (elderly and non-elderly)  
7  
8  
9 204 with other factors was adopted for the analysis of the specific factors affecting the  
10  
11 205 inappropriate admission of elderly people in comparison with those affecting the  
12  
13 206 inappropriate admission of non-elderly people. Taking the appropriateness of  
14  
15  
16 207 admission as the dependent variable, we directly included the main effect of the  
17  
18 208 independent variable to the regression model, and the interaction effect was screened  
19  
20  
21 209 into the model by stepwise regression. Finally, the model was formed.

$$\begin{aligned}
 \text{Logit}(P) = & \beta_0 + \beta_1 \text{County} + \beta_2 \text{Age} + \beta_3 \text{Gender} + \beta_4 \text{Disease} + \beta_5 \text{Department} + \beta_6 \text{DOCD} \\
 & + \beta_7 \text{Health status} + \beta_8 \text{RTDAR} + \beta_9 \text{Severity} + \beta_{10} \text{CORR} + \beta_{11} \text{Affordability} \\
 & + \beta_{12} \text{Hospitalization convenience} + \beta_{13} \text{Age} \times \text{Gender} + \beta_{14} \text{Age} \times \text{DOCD} + \varepsilon
 \end{aligned}$$

210 For 230 elderly respondents, binary logistic regression analysis was used for the  
211 identification of the determinants of the inappropriate admission of the elderly. The  
212 patient admission rationality was the dependent variable, and the independent variable  
213 was selected using the stepwise regression. The regression model is as follows:

$$\text{Logit}(P) = \beta_0 + \beta_1 \text{County} + \beta_2 \text{Age} + \beta_3 \text{Gender} + \beta_4 \text{Department} + \beta_5 \text{RTDAR} + \beta_6 \text{Affordability} + \varepsilon$$

## 215 **Research Ethics**

216 The research methods and investigation tools in this study were approved by the  
217 Ethics Committee of Tongji Medical College, Huazhong University of Science and  
218 Technology (IORG No: IORG0003571). The patient information were not disclosed  
219 before the analysis.

220

221 **Result**222 *Selected characteristics of the study population*

223 The study included 652 admitted patients, of which 230 were elderly patients. The  
224 selected characteristics of the study population are shown in Tables 2 and 3. In this  
225 study, the average age of the elderly was  $70.73 \pm 7.841$  years, and 53.6% were female  
226 patients. The average age of non-elderly patients was  $28.33 \pm 21.34$  years, and 49.3%  
227 were female patients. Most of the elderly patients were hospitalised in internal  
228 medicine (79.1%) and were admitted because of circulatory diseases (43.9%). Only  
229 43.9% of the elderly patients were in good health, and the majority of the patients  
230 have chronic diseases (74.3%). Older patients had a higher expectation of admission  
231 and always think that their respective diseases are serious. The number of elderly  
232 patients who considered the reimbursement of inpatient was higher than that of  
233 outpatient, which account for only 43.9% of the elderly respondents. Only 32.2% of  
234 elderly patients thought that they can fully pay for the hospitalization, and 49.6%  
235 considered that hospitalization is inconvenient.

236 Of the 230 elderly patients surveyed, 69 were inappropriately admitted, with the rate  
237 of 30%, which was lower than that of non-elderly patients (40.7%). The inappropriate  
238 admission rate of elderly people in Dingyuan was the highest (51.8%), whereas the  
239 lowest was in Yilong (14.5%); the difference between the two counties was  
240 statistically significant ( $\chi^2=22.8, P<0.001$ ).

1  
2  
3  
4 241 *Characteristics of inappropriate admission to the elderly*

5  
6 242 The objective admission indicators of elderly patients (Table 2) show no significant  
7  
8 243 difference in the distribution of admission appropriateness among gender, age,  
9  
10 244 department, disease, health status and diagnosis of chronic diseases. For the  
11  
12 245 non-elderly group, a younger age correspond to higher inappropriate admission rate  
13  
14 246 ( $P<0.001$ ). Moreover, pediatric patients with the highest inappropriate admission rate  
15  
16 247 ( $\chi^2=55.742$ ,  $P<0.001$ ) and patients with chronic diseases are more likely to be  
17  
18 248 inappropriately admitted ( $\chi^2=9.092$ ,  $P=0.003$ ).

19  
20  
21 249 The characteristics of inappropriate admission under patients' subjective perceptions  
22  
23 250 is indicated in Table 3. The inappropriate admission rate of elderly patients varies with  
24  
25 251 the different comparison of the reimbursement of inpatient and outpatient ( $\chi^2=11.8$ ,  
26  
27 252  $P=0.003$ ). The number of elderly patients who think that the reimbursement of  
28  
29 253 inpatient is higher than that of outpatient had the highest rate of inappropriate  
30  
31 254 admission (43.9%). Moreover, the affordability of older patients to hospitalization  
32  
33 255 costs was significantly associated with inappropriate admission ( $\chi^2=9.52$ ,  $P=0.009$ ).  
34  
35 256 Elderly patient who can fully afford the hospitalization cost had the highest  
36  
37 257 inappropriate admission rate (37.8%). No statistical difference was found in the  
38  
39 258 distribution of admission appropriateness of the elderly among the response to  
40  
41 259 doctor's admission request, the disease severity and hospitalization convenience.

42  
43 260 In the non-elderly group, patients who decided to be admitted to hospitals on their  
44  
45 261 own had a higher inappropriate admission rate than those whose decision was made  
46  
47 262 by someone else ( $\chi^2=14.258$ ,  $P=0.007$ ). Patients who think that the reimbursement of



263 inpatient is higher than that of outpatient had the highest rate of inappropriate  
 264 admission ( $\chi^2=11.542$ ,  $P=0.003$ ), and the results were consistent with those in the  
 265 elderly group.

266 **Table 2 The Distribution of Inappropriate Admission Characteristics of patients**  
 267 **according to the medical records**

| Variable                        | elderly           |                          |                           |        | non-elderly       |                          |                           |         |
|---------------------------------|-------------------|--------------------------|---------------------------|--------|-------------------|--------------------------|---------------------------|---------|
|                                 | N<br>(column %)   | Appropriate<br>N(line %) | Inappropriate<br>N(line%) | P      | N<br>(column %)   | Appropriate<br>N(line %) | Inappropriate<br>N(line%) | P       |
| All                             | 230               | 161(70.0)                | 69(30.0)                  |        | 422               | 250(59.2)                | 172(40.8)                 |         |
| County                          |                   |                          |                           |        |                   |                          |                           |         |
| Yilong                          | 62(27.0)          | 53(85.5)                 | 9(14.5)                   | <0.001 | 95(22.5)          | 64(67.4)                 | 31(32.6)                  | <0.001  |
| Huining                         | 61(26.5)          | 48(78.7)                 | 13(21.3)                  |        | 92(21.8)          | 65(70.7)                 | 27(29.3)                  |         |
| Dingyuan                        | 56(24.3)          | 27(48.2)                 | 29(51.8)                  |        | 120(28.4)         | 47(39.2)                 | 73(60.8)                  |         |
| Weiyuan                         | 51(22.2)          | 33(64.7)                 | 18(35.3)                  |        | 115(27.3)         | 74(64.3)                 | 41(35.7)                  |         |
| Gender                          |                   |                          |                           |        |                   |                          |                           |         |
| Male                            | 109(47.4)         | 71(65.1)                 | 38(34.9)                  | 0.127  | 214(50.7)         | 133(62.1)                | 81(37.9)                  | 0.218   |
| Female                          | 121(52.6)         | 90(74.4)                 | 31(25.6)                  |        | 208(49.3)         | 117(56.3)                | 91(43.8)                  |         |
| Age, Mean $\pm$ SD <sup>a</sup> | 70.73 $\pm$ 7.841 | 70.9 $\pm$ 7.566         | 70.20 $\pm$ 7.305         | 0.485* | 28.33 $\pm$ 21.34 | 33.47 $\pm$ 19.332       | 24.33 $\pm$ 22.600        | <0.001* |
| Department                      |                   |                          |                           |        |                   |                          |                           |         |
| Internal medicine               | 182(79.1)         | 125(68.7)                | 57(31.3)                  | 0.155  | 149(35.3)         | 97(65.1)                 | 52(34.9)                  | <0.001  |
| Surgery                         | 34(14.8)          | 28(82.4)                 | 6(17.6)                   |        | 70(16.6)          | 62(88.6)                 | 8(11.4)                   |         |
| Peadiatric                      | 0(0.0)            | 0                        | 0                         |        | 154(36.5)         | 59(38.3)                 | 95(61.7)                  |         |
| Others                          | 14(6.1)           | 8(57.1)                  | 6(42.9)                   |        | 49(11.6)          | 32(65.3)                 | 17(34.7)                  |         |
| Disease category                |                   |                          |                           |        |                   |                          |                           |         |
| Circulatory disease             | 101(43.9)         | 70(39.3)                 | 32(30.7)                  | 0.271  | 88(20.9)          | 54(61.4)                 | 34(38.6)                  | 0.084   |
| Respiratory disease             | 18(7.8)           | 15(83.3)                 | 3(16.7)                   |        | 77(18.2)          | 47(61.0)                 | 30(39.0)                  |         |
| Digestive disease               | 23(10.0)          | 14(60.9)                 | 9(39.1)                   |        | 60(14.2)          | 33(55.0)                 | 27(45.0)                  |         |
| Urinary disease                 | 5(2.2)            | 4(80.0)                  | 1(20.0)                   |        | 20(4.7)           | 15(75.0)                 | 5(25.0)                   |         |
| Endocrinology diseases          | 16(7.0)           | 9(56.3)                  | 7(43.8)                   |        | 18(4.3)           | 12(66.7)                 | 6(33.3)                   |         |
| Bones and muscles               | 6(2.6)            | 3(50.0)                  | 3(50.0)                   |        | 17(4.0)           | 8(47.1)                  | 9(52.9)                   |         |
| Injury and poisoning            | 10(4.3)           | 10(100.0)                | 0(0.0)                    |        | 22(5.2)           | 19(86.4)                 | 3(13.6)                   |         |
| Symptoms and signs              | 38(16.5)          | 26(68.4)                 | 12(31.6)                  |        | 62(14.7)          | 33(53.2)                 | 29(46.8)                  |         |
| Others                          | 13(5.7)           | 10(76.9)                 | 15(23.1)                  |        | 58(13.7)          | 29(50.0)                 | 29(50.0)                  |         |
| Health status                   |                   |                          |                           |        |                   |                          |                           |         |
| Good                            | 101(43.9)         | 71(70.3)                 | 30(29.7)                  | 0.98   | 324(76.8)         | 183(56.5)                | 141(43.5)                 | 0.101   |
| General                         | 108(47.0)         | 75(69.4)                 | 33(30.6)                  |        | 83(19.7)          | 56(67.5)                 | 27(32.5)                  |         |
| Poor                            | 21(9.1)           | 15(71.4)                 | 6(28.6)                   |        | 15(3.6)           |                          |                           |         |
| DOCD                            |                   |                          |                           |        |                   |                          |                           |         |
| Yes                             | 171(74.3)         | 117(68.4)                | 54(31.6)                  | 0.414  | 179(42.4)         | 91(50.8)                 | 88(49.2)                  | 0.003   |

No 59(25.7) 44(74.6) 15(25.4) 243(57.6) 159(65.4) 84(34.6)

Note: DOCD, Diagnosis of chronic diseases. <sup>a</sup> SD, Standard deviation. \* T text.

268

269

270

271

272

273

**Table 3 Distributions of characteristics of appropriateness admission under the subjective perception of patients**

| Variable                                        | elderly         |                          |                           |         | non-elderly     |                          |                           |         |
|-------------------------------------------------|-----------------|--------------------------|---------------------------|---------|-----------------|--------------------------|---------------------------|---------|
|                                                 | N<br>(column %) | Appropriate<br>N(line %) | Inappropriate<br>N(line%) | P-value | N<br>(column %) | Appropriate<br>N(line %) | Inappropriate<br>N(line%) | P-value |
| RTDAR                                           |                 |                          |                           |         |                 |                          |                           |         |
| No doubt                                        | 63(27.4)        | 90(56.3)                 | 70(43.8)                  | 0.119   | 160(37.9)       | 46(73.0)                 | 17(27.0)                  | 0.007   |
| Doubt                                           | 17(7.4)         | 16(59.3)                 | 11(40.7)                  |         | 27(6.4)         | 16(94.1)                 | 1(5.9)                    |         |
| Expected                                        | 124(53.9)       | 124(65.3)                | 66(34.7)                  |         | 190(45.0)       | 84(67.7)                 | 40(32.3)                  |         |
| Family requirements                             | 13(5.7)         | 8(80.0)                  | 2 ( 20.0 )                |         | 10(2.4)         | 8(61.5)                  | 5(38.5)                   |         |
| Others                                          | 13(5.7)         | 12(34.3)                 | 23(65.7)                  |         | 35(8.3)         | 7(53.8)                  | 6(46.2)                   |         |
| Disease severity                                |                 |                          |                           |         |                 |                          |                           |         |
| Light                                           | 8(3.5)          | 39(58.2)                 | 28(41.8)                  | 0.546   | 67(15.9)        | 7(87.5)                  | 1(12.5)                   | 0.697   |
| General                                         | 46(20.0)        | 63(56.3)                 | 49(43.8)                  |         | 112(26.5)       | 32(69.6)                 | 14(30.4)                  |         |
| Serious                                         | 176(76.5)       | 148(60.9)                | 95(39.1)                  |         | 243(57.6)       | 122(69.3)                | 54(30.7)                  |         |
| Comparison of R <sub>0</sub> and R <sub>1</sub> |                 |                          |                           |         |                 |                          |                           |         |
| R <sub>0</sub> >R <sub>1</sub>                  | 62(27.0)        | 37(80.4)                 | 9(19.6)                   | 0.003   | 46(10.9)        | 54(87.1)                 | 8(12.9)                   | 0.003   |
| R <sub>1</sub> <R <sub>0</sub>                  | 101(43.9)       | 101(53.2)                | 89(46.8)                  |         | 190(45.0)       | 64(56.1)                 | 37(43.9)                  |         |
| Unknown                                         | 67(29.1)        | 112(60.2)                | 74(39.8)                  |         | 186(44.1)       | 43(70.9)                 | 24(29.1)                  |         |
| Affordability                                   |                 |                          |                           |         |                 |                          |                           |         |
| Difficult                                       | 73(31.7)        | 37(61.7)                 | 23(38.3)                  | 0.009   | 60(14.2)        | 61(83.6)                 | 12(16.4)                  | 0.842   |
| Reluctantly                                     | 83(36.1)        | 124(57.9)                | 90(42.1)                  |         | 214(50.7)       | 54(65.1)                 | 29(34.9)                  |         |
| Fully payable                                   | 74(32.2)        | 89(60.1)                 | 59(39.9)                  |         | 148(35.1)       | 46(62.2)                 | 28(37.8)                  |         |
| Hospitalization convenience                     |                 |                          |                           |         |                 |                          |                           |         |
| Yes                                             | 116(50.4)       | 169(60.8)                | 109(39.2)                 | 0.085   | 278(65.9)       | 75(64.7)                 | 41(35.3)                  | 0.368   |
| No                                              | 114(49.6)       | 81(56.3)                 | 63(43.8)                  |         | 144(34.1)       | 86(75.4)                 | 28(24.6)                  |         |

Note: RTDAR, Response to Doctor's Admission Requirement.

RO, Reimbursement of Outpatient; RI, Reimbursement of Inpatient.

274 ***Determinants of inappropriate admission to hospital for elderly people***

275 Logistic regression based on the interaction of age elderly and non-elderly group) and

276 other factors shows that the interaction between age and gender and between age and

1  
2  
3 277 chronic disease both had influence on patients' inappropriate admission to hospital.  
4  
5  
6 278 Compared with non-elderly patients, the risk of inappropriate admission of female  
7  
8 279 elderly patients was lower (OR=0.33), and elderly patients with chronic disease were  
9  
10  
11 280 more likely to be inappropriately admitted to hospital (OR=3.33).  
12  
13  
14  
15  
16  
17  
18  
19  
20  
21  
22  
23  
24  
25  
26  
27  
28  
29  
30  
31  
32  
33  
34  
35  
36  
37  
38  
39  
40  
41  
42  
43  
44  
45  
46  
47  
48  
49  
50  
51  
52  
53  
54  
55  
56  
57  
58  
59  
60

For peer review only

281

**Table 5 Logistic Regression Analysis Based on the Interaction of Age and Other Factors (n=652)**

| Variable                                               | COR(95%CI)         | AOR(95%CI) †        | Variable                                                                                           | COR(95%CI)         | AOR(95%CI) †       |
|--------------------------------------------------------|--------------------|---------------------|----------------------------------------------------------------------------------------------------|--------------------|--------------------|
| County(ref:Yilong) <sup>#*</sup>                       |                    |                     | Health status(ref:Good)                                                                            |                    |                    |
| Huining                                                | 1.04(0.62 to 1.72) | 1.29(0.68 to 2.44)  | General                                                                                            | 0.68(0.47 to 0.98) | 0.82(0.50 to 1.33) |
| Dingyuan                                               | 4.03(2.52 to 6.43) | 5.99(3.08 to 11.68) | Poor                                                                                               | 0.57(0.27 to 1.22) | 0.83(0.33 to 2.06) |
| Weiyuan                                                | 1.16(0.99 to 2.61) | 1.85(0.98 to 3.48)  | RTDAR(ref:No doubt) <sup>#</sup>                                                                   |                    |                    |
| Age(ref: non-elderly) <sup>#*</sup>                    | 0.62(0.44 to 0.88) | 1.35(0.59 to 3.10)  | Doubt                                                                                              | 0.59(0.29 to 1.20) | 0.6(0.26 to 1.39)  |
| Gender(ref: male) <sup>*</sup>                         | 1.01(0.74 to 1.39) | 1.64(1.03 to 2.63)  | Expected                                                                                           | 0.80(0.56 to 1.14) | 0.82(0.53 to 1.27) |
| Disease category(ref:Circulatory disease) <sup>#</sup> |                    |                     | Family requirements                                                                                | 0.68(0.27 to 1.73) | 0.73(0.25 to 2.09) |
| Respiratory disease                                    | 1.02(0.61 to 1.71) | 0.83(0.43 to 1.58)  | Others                                                                                             | 2.39(1.26 to 4.52) | 1.91(0.89 to 4.09) |
| Digestive disease                                      | 1.46(0.86 to 2.48) | 2.84(1.44 to 5.58)  | Disease severity(ref:Light)                                                                        |                    |                    |
| Urinary disease                                        | 0.60(0.23 to 1.58) | 1.04(0.32 to 3.39)  | General                                                                                            | 1.05(0.60 to 1.85) | 1.05(0.51 to 2.15) |
| Endocrinology diseases                                 | 1.81(0.56 to 2.51) | 1.43(0.60 to 3.45)  | Serious                                                                                            | 0.88(0.53 to 1.45) | 1.28(0.66 to 2.50) |
| Bones and muscles                                      | 2.08(0.87 to 4.98) | 1.45(0.52 to 4.06)  | Comparison of R <sub>0</sub> and R <sub>1</sub> (ref:R <sub>0</sub> >R <sub>1</sub> ) <sup>#</sup> |                    |                    |
| Injury and poisoning                                   | 0.20(0.06 to 0.67) | 0.99(0.24 to 4.13)  | R <sub>1</sub> <R <sub>0</sub>                                                                     | 4.09(2.32 to 7.21) | 2.13(1.08 to 4.21) |
| Symptoms and signs                                     | 1.33(0.81 to 2.18) | 1.63(0.91 to 2.93)  | Unknown                                                                                            | 3.38(1.90 to 6.02) | 1.62(0.80 to 3.27) |
| Others                                                 | 1.57(0.90 to 2.73) | 1.30(0.64 to 2.64)  | Affordability(ref:Difficult) <sup>#*</sup>                                                         |                    |                    |
| Department(ref:Internal medicine) <sup>#*</sup>        |                    |                     | Reluctantly                                                                                        | 1.87(1.19 to 2.94) | 1.14(0.66 to 1.96) |
| Surgery                                                | 0.32(0.17 to 0.58) | 0.11(0.05 to 0.25)  | Fully payable                                                                                      | 1.80(1.13 to 2.89) | 1.84(1.05 to 3.24) |
| Pediatric                                              | 3.28(2.20 to 4.88) | 4.26(1.94 to 9.35)  | Hospitalization convenience(ref:Yes)                                                               | 0.89(0.64 to 1.23) | 1.25(0.84 to 1.88) |
| Others                                                 | 1.17(0.67 to 2.05) | 1.16(0.59 to 2.29)  | Age×Gender (ref:non-elderly×male) <sup>#*</sup>                                                    | 0.53(0.34 to 0.82) | 0.33(0.15 to 0.73) |
| DOCD(ref:No) <sup>#*</sup>                             | 1.40(1.02 to 1.93) | 0.32(0.16 to 0.65)  | Age×DOCD(ref:non-elderly×No) <sup>*</sup>                                                          | 0.55(0.30 to 1.02) | 3.33(1.23 to 9.04) |

Note: <sup>#</sup>Univariate regression analysis  $p<0.05$ , <sup>\*</sup>Logistic Regression Analysis  $p<0.05$

†Adjusted for all other covariates listed in the table

1  
2  
3  
4  
5  
6  
7  
8  
9  
10  
11  
12  
13  
14  
15  
16  
17  
18  
19  
20  
21  
22  
23  
24  
25  
26  
27  
28  
29  
30  
31  
32  
33  
34  
35  
36  
37  
38  
39  
40  
41  
42  
43  
44  
45  
46  
47

---

AOR, adjusted OR; COR, crude OR.

For peer review only

282 The results of the binary logistic regression for elderly patients are shown in Table 4.  
 283 Taking Yilong as the reference group, rural elderly patients in Dingyuan had a higher  
 284 risk of inappropriate admission to hospital (OR=9.74). A higher age corresponds to a  
 285 lower possibility of inappropriate admission (OR=0.94). Elderly people in the surgery  
 286 department are less likely to be admitted to hospital inappropriately (OR=0.21). For  
 287 the subjective cognition of elderly patients, our study showed that only patients who  
 288 have doubts about the doctor's admission requirement but decided to be hospitalised  
 289 after communication with the doctor were the least likely to be admitted  
 290 inappropriately (OR=0.07).

291 **Table4 logistic regression analysis of inappropriate admission of elderly (n = 230)**

| Variable                            | COR(95%CI)          | AOR(95%CI) †        |
|-------------------------------------|---------------------|---------------------|
| County(ref: Yilong)*                |                     |                     |
| Huining                             | 1.60(0.63 to 4.06)  | 0.67(0.21 to 2.07)  |
| Dingyuan                            | 6.33(2.63 to 15.25) | 9.74(3.30 to 28.41) |
| Weiyuan                             | 3.21(1.29 to 7.98)  | 3.36(1.08 to 10.46) |
| Age(years)                          | 0.99(0.95 to 1.03)  | 0.94(0.90 to 0.99)  |
| Gender (ref: male)*                 | 0.64(0.36 to 1.14)  | 0.49(0.25 to 2.98)  |
| Department (ref:internal medicine)* |                     |                     |
| Surgery                             | 0.47(0.18 to 1.20)  | 0.21(0.07 to 0.61)  |
| Others                              | 1.65(0.55 to 4.96)  | 1.49(0.35 to 6.27)  |
| RTDAR (ref: No doubt)*              |                     |                     |
| Doubt                               | 0.17(0.02 to 1.38)  | 0.07(0.01 to 0.76)  |
| Expected                            | 1.29(0.66 to 2.52)  | 0.87(0.39 to 1.96)  |
| Family requirements                 | 1.69(0.49 to 5.89)  | 1.48(0.34 to 6.34)  |
| Others                              | 2.32(0.68 to 7.89)  | 4.14(0.94 to 18.24) |
| Affordability(ref: difficult)#      |                     |                     |
| Reluctantly                         | 2.73(1.27 to 5.87)  | 1.69(0.68 to 4.20)  |
| Complete                            | 3.09(1.42 to 6.73)  | 2.84(1.13 to 7.17)  |

Note: forward stepwise :  $\alpha_{\text{entry}}=0.1$  ,  $\alpha_{\text{removal}}=0.15$

#Univariate regression analysis  $p<0.05$  , \*Logistic Regression Analysis  $p<0.05$

†Adjusted for all other covariates listed in the table

---

AOR, adjusted OR; COR, crude OR.

292

## 293 **Discussion**

### 294 *Inappropriate admission of elderly in rural China*

295 In this study, the inappropriate admission rate of patients over 60 year old in rural  
296 areas in China is 30%, which is generally higher than that reported of 27% in the UK  
297 <sup>[19]</sup>, 9.8% in Italy<sup>[15]</sup>, 9.2% in Switzerland<sup>[20]</sup> and 8.8% in France<sup>[14]</sup>. Yan et al.<sup>[21]</sup>  
298 found that the inappropriate admission rate of patients over 60 years in rural areas in  
299 China was 14.3%, which was also lower than the results of this study. This result may  
300 be attributed to the differences among the studies with regard to health service system,  
301 geographical environment or study period. These studies were mainly concerned on  
302 elderly people of different age groups and in different admission departments. The  
303 inappropriate admission rate of elderly patients (30%) was lower than that of  
304 non-elderly patients (40.8%) probably because the body functions of elderly patients  
305 are worse than those of non-elderly patients. Moreover, an elderly person presents  
306 more obvious and serious symptoms at the onset of a disease and is thus more likely  
307 to be inappropriately admitted.

### 308 *Characteristics of elderly patients who were hospitalised inappropriately*

309 Significant differences were found in the distribution of inappropriate admission  
310 among elderly patients across different counties. Among the four surveyed areas,  
311 Dingyuan had the highest rate of inappropriate admission, whereas Yilong has the  
312 lowest. It may be related to the differences in health policies, geographical

1  
2  
3  
4 313 environment and customs between the counties. Elderly patients who can fully afford  
5  
6 314 the hospitalization costs had the highest inappropriate admission rate. It may be  
7  
8 315 caused by economic difficulties that restrict the utilization of health services for  
9  
10 316 elderly patients in rural areas in China <sup>[22]</sup>, and elderly patients who can afford  
11  
12 317 hospitalization expenses are less subjected to economic constraints of health services;  
13  
14 318 to pursue higher quality medical services, they often choose inpatient services,  
15  
16 319 thereby increasing their likelihood of inappropriate admission. Our research proves  
17  
18 320 that elderly people who have a correct understanding of medical insurance  
19  
20 321 reimbursement have higher inappropriate admission rates, probably because the  
21  
22 322 medical insurance reimbursement policy has promoted the excessive release of  
23  
24 323 hospitalization services demand for elderly patients <sup>[23]</sup>.

25  
26  
27  
28  
29  
30 324 ***Determinants of inappropriate admission for elderly people***

31  
32 325 Gender and chronic diseases are the specific factors affecting the inappropriate  
33  
34 326 admission of elderly people. Compared with non-elderly patients, the tendency of  
35  
36 327 female elderly patients for inappropriate hospitalization was less obvious. Moreover,  
37  
38 328 the risk of inappropriate admission of elderly patients with chronic disease was higher,  
39  
40 329 which is consistent with the findings of Gamper, probably because relative to  
41  
42 330 non-elderly people, elderly people are less aware of the disease. Moreover, a perfect  
43  
44 331 chronic disease management is lacking in rural areas in China. When the symptoms of  
45  
46 332 chronic diseases appear, it is easier for elderly earlier to misjudge the disease and  
47  
48 333 blindly choose to be admitted to a hospital.

49  
50 334 The logistic regression shows that the risk of inappropriate admission varies across  
51  
52  
53  
54



1  
2  
3 335 different counties in China's rural areas. The health policy in different counties,  
4  
5  
6 336 especially the medical insurance policy, plays a key role in the inappropriate  
7  
8 337 admission of elderly patients. A large gap exists between the outpatient and  
9  
10  
11 338 hospitalization compensation in the survey area. Especially at county-level hospitals,  
12  
13 339 the general outpatient reimbursement is not covered, hence, elderly people in rural  
14  
15 340 areas prefer hospitalization and get more medical expense reimbursement. Dingyuan  
16  
17 341 has the highest risk of inappropriate admission for elderly patients, which may be  
18  
19 342 caused by its high level of reimbursement policy of the NRCMS. In 2017, the  
20  
21 343 reimbursement ratio of NRCMS in Dingyuan county-level hospital was 85%, and the  
22  
23 344 annual payment limitation of each inpatient could reach 200 thousand RMB, which  
24  
25 345 was higher than that of Yilong and Weiyuan. Although the reimbursement ratio of  
26  
27 346 NRCMS and the annual payment limitation of each inpatient in Yilong are higher than  
28  
29 347 that of Weiyuan, the risk of inappropriate admission of elderly patients in Weiyuan  
30  
31 348 was higher, may be because the greater impact of its geographical environment.  
32  
33 349 Yilong is located in low hills and has a convenient mode of transportation, whereas  
34  
35 350 Weiyuan is located in high mountainous area, where the terrain is complex and the  
36  
37 351 traffic is inconvenient, which make it more difficult for elderly patients to travel and  
38  
39 352 make them choose to be admitted for treatment convenience [24].  
40  
41  
42 353 Gender and age also had an impact on the inappropriate admission of elderly people  
43  
44 354 in rural areas in China. Compared with female elderly patients, the inappropriate  
45  
46 355 admission tendency of male elderly patients is more obvious. This observation is  
47  
48 356 probably caused male patients by the generally higher status in the family and society  
49  
50  
51  
52  
53  
54  
55  
56  
57  
58  
59  
60

1  
2  
3  
4 357 of male elderly patients than females <sup>[25]</sup>, and their health status receives more  
5  
6 358 attention, which makes them willing to use hospitalization to ensure the treatment  
7  
8 359 effect and resulting in inappropriate admission. With increasing age, elderly patients  
9  
10 360 are less likely to be admitted inappropriately. This result is consistent with that of  
11  
12  
13 361 other studies <sup>[26]</sup>. The reason is mainly because older patients have severely reduced  
14  
15 362 their body functions, and their disease are more serious; hence, inappropriate  
16  
17  
18 363 admission is relatively rare.

19  
20 364 The department was also a key factor in the inappropriate admission of elderly  
21  
22  
23 365 patients. Compared with surgery, medical patients are more prone to inappropriate  
24  
25 366 admissions (the inappropriate admission rate of 31.3%), which is consistent with the  
26  
27  
28 367 results of Ferrero <sup>[27]</sup>. This observation might be caused by two reasons: On the one  
29  
30 368 hand, many surgical-related indicators are included in the original evaluation  
31  
32  
33 369 indicators in AEP <sup>[28]</sup>, which improves the rationality of surgical patient admission. On  
34  
35 370 the other hand, most elderly patients suffer from chronic diseases, making internal  
36  
37  
38 371 medicine departments easily selected for treatment. However, the performance  
39  
40 372 appraisal of Chinese hospital is always directly linked to departmental income.  
41  
42  
43 373 However, the internal medicine income is significantly lower than that of surgery,  
44  
45 374 which causes physicians to produce a more induced demand in pursuit of  
46  
47 375 departmental income <sup>[29]</sup>. In addition, the hospital lacks admission standards for the  
48  
49  
50 376 severity of the disease, and the intensity of medical services required. These factors  
51  
52  
53 377 have increased the possibility of inappropriate admission to the elderly.

54  
55 378 The response of rural elderly patients to hospital admission requirements directly

1  
2  
3  
4 379 affects the appropriateness of admission. Elderly patients who had doubts about the  
5  
6 380 doctor's admission requirements and communicated with the doctor before deciding to  
7  
8 381 enter the hospital have a significantly less possibility of being admitted  
9  
10  
11 382 inappropriately. The influence of this factor on the appropriateness of hospitalization  
12  
13 383 in rural elderly is mainly reflected in two points. Firstly, Chinese rural areas have not  
14  
15 384 established a perfect 'family doctor first' consultation mechanism, and rural elderly  
16  
17 385 patients lack the guidance of the first diagnosis and the correct understanding of their  
18  
19 386 disease. Cultural degree is low especially for the elderly patients in rural areas in  
20  
21 387 China, which makes their judgment of the disease entirely dependent on the clinician.  
22  
23  
24  
25 388 For doctors' admission requirements, if elderly patients communicate with doctors  
26  
27 389 effectively, understand their own disease condition and make admission decisions  
28  
29 390 accordingly, inappropriate admission tendency of elderly patients is significantly  
30  
31 391 reduced. Secondly, the doctor's request for admission to the patient is not only based  
32  
33 392 on the judgment of the patient's basic condition but also with the factors of medical  
34  
35 393 accident risk aversion, departmental income, etc. <sup>[30,31]</sup>. Clinical decision-making of  
36  
37 394 doctors under various factors meets the appropriate admission requirements of elderly  
38  
39 395 patients becomes a key point affecting the rationality of patients' admission, which  
40  
41 396 was proved by Aida bianco and Mytton.  
42  
43  
44  
45  
46  
47

## 48 397 **Conclusion**

49  
50  
51 398 In this study, the rate of inappropriate admission of elderly patients in the rural  
52  
53 399 county-level medical institutions in China's is relatively higher than any of the results  
54  
55  
56

1  
2  
3  
4 400 reported by other studies. Gender and chronic diseases are the specific factors  
5  
6 401 affecting the appropriateness of admission of elderly patients in rural areas in China.  
7  
8 402 County, age, gender, department and the response to the doctor's admission  
9  
10 403 requirements are the determinants of the inappropriate admission of elderly patients.  
11  
12  
13 404 As indicated by our results, some pertinent policy recommendations were pursued.  
14  
15 405 Firstly, the NRCMS management department should adjust the reimbursement ratio of  
16  
17 406 hospitalization and outpatient according to actual inspections and increase the ratio of  
18  
19 407 outpatient reimbursement to a certain extent, reducing unnecessary hospitalization  
20  
21 408 needs. Secondly, medical institutions need to establish a performance appraisal system  
22  
23 409 with medical quality and patient satisfaction as the core, and an admission criteria for  
24  
25 410 the severity of the disease and the intensity of required medical services should also  
26  
27 411 be established, thereby constraining the inappropriate hospitalization behaviour of  
28  
29 412 older patients in different departments. Thirdly, China's rural areas need to establish a  
30  
31 413 family doctor service based on the concept of health management and provide the  
32  
33 414 services of health management <sup>[32]</sup>, medical consultation and guidance for elderly  
34  
35 415 patients to improve their cognition of the disease and reduce the leading position of  
36  
37 416 the doctor's decision in the process of admission and the inappropriate admission rate.  
38  
39  
40  
41  
42  
43  
44

## 417 **Limitation**

418 This study have two limitations. Firstly, the cross-sectional study design could not  
419 determine the causal relationship between unreasonable admission and related factors  
420 in elderly patients. Secondly, no unified identification standard exists for the  
421 inappropriate admission of elderly patients in the current studies <sup>[33]</sup>, making the

1  
2  
3 422 identification of inappropriate admission dependent on the AEP. The AEP applicable  
4  
5  
6 423 to the entire population may not be the best tool for evaluating the inappropriate  
7  
8 424 admission of elderly patients <sup>[18, 34, 35]</sup>.

## 10 425 **Competing interests**

13 426 The authors declare no competing interests.

## 16 427 **Authors' contributions**

18 428 X-M.H, H-X.G and Y.Z participated in the conception and design of the manuscript.

20 429 X-M.H and H-X.G contributed equally to the development of this research study.. Y.Z,

22 430 H-M.L, D.S, J-J.C and D.J participated in the data collection and statistical analysis.

24 431 Y-C.C helped draft, review and revise the manuscript. All authors gave their approval

26 432 to publish this version of the manuscript.

## 29 433 **Funding statement**

31 434 This research is supported by the National Natural Science Foundation of China

33 435 (Grant No.: 71473096).

## 36 436 **Disclosure**

38 437 This work has never been published or presented at any time in the past.

## 40 438 **Provenance and peer review**

42 439 This work is not commissioned and is externally peer reviewed.

## 44 440 **Data sharing statement**

46 441 The anonymised dataset can be requested by sending an email to the corresponding

48 442 author.

## Reference:

443

- 444 1. National Bureau of Statistics of China. Statistical Communiqué of the People's Republic of China  
445 on the 2017 National Economic and Social Development [N]. China Information Daily,  
446 2018-03-01 (003).
- 447 2. Center for Health Statistics and Information. An Analysis Report of National Health Services  
448 Survey in China, 2013 [M]. Peking Union Medical College Press, 2015.
- 449 3. Restuccia, J.; Shwartz, M.; Ash, A.; Payne, S. High hospital admission rates and inappropriate  
450 care. *Health affairs (Project Hope)* 1996, 15, 156-163. 'doi': 10.1377/hlthaff.15.4.156
- 451 4. Xiaona Gao, Yingchun Chen, Zhaoqun Chu, Lijing Zhang. Analysis of characteristic excessive  
452 demand for elderly inpatient service and causes covered by NRCMS [J]. *Chinese Journal of*  
453 *Hospital Administration*, 2015(4):279-282. 'doi': 10.3760/cma.j.issn.1000-6672.2015.04.011
- 454 5. Lavis, J.N.; Anderson, G.M. Appropriateness in health care delivery: Definitions, measurement  
455 and policy implications. *CAN MED ASSOC J* 1996, 154, 321-328.
- 456 6. Payne, S.M. Identifying and managing inappropriate hospital utilization: a policy synthesis.  
457 *HEALTH SERVICES* 1987, 22, 709-769.
- 458 7. Campbell, J. Inappropriate admissions: thoughts of patients and referring doctors. *J R Soc Med*  
459 2001, 94, 628-631. 'doi': 10.1177/014107680109401206
- 460 8. World Health Organization. China country assessment report on ageing and health [R].2016.
- 461 9. Jinghong Chen. Research on Demand and Utilization of Health Service among the Elderly in Rural  
462 Areas under the Background of Ageing[D] Peking Union Medical College,2012.
- 463 10. XIE Chun-yan, HU Shan-lian, SUN Guo-zhen, et al. Exploration and Experience of Provider  
464 Payment System Reform in China [J]. *Chinese Health Economics*, 2010,29(05):27-29.  
465 'doi':10.3969/j.issn.1003-0743.2010.05.008
- 466 11. Creditor M C. Hazards of hospitalization of the elderly[J]. *Annals of Internal Medicine*, 1993,  
467 118(3):219-223. 'doi': 10.7326/0003-4819-118-3-199302010-00011
- 468 12. Fusco M, Buja A, Piergentili P, et al. Individual and hospital-related determinants of potentially  
469 inappropriate admissions emerging from administrative records.[J]. *Health Policy*, 2016,  
470 'doi':120(11):1304-1312. 10.1016/j.healthpol.2016.09.015
- 471 13. Gamper G, Wiedermann W, Barisonzo R, et al. Inappropriate hospital admission: interaction  
472 between patient age and co-morbidity[J]. *Internal & Emergency Medicine*, 2011, 6(4):361-367.  
473 'doi':10.1007/s11739-011-0629-0
- 474 14. Menand E, Lenain E, Lazarovici C, et al. French multicenter evaluation of the appropriateness of  
475 admission to the emergency department of the over-80s[J]. *Journal of Nutrition Health & Aging*,  
476 2015, 19(6):1-7. 'doi':10.1007/s12603-015-0489-9
- 477 15. Bianco A, Pileggi C, Rizza P, et al. An assessment of inappropriate hospital bed utilization by  
478 elderly patients in southern Italy[J]. *Aging Clinical & Experimental Research*, 2006,  
479 18(3):249-256. 'doi':10.1007/BF03324656
- 480 16. Mytton O T, Oliver D, Mirza N, et al. Avoidable acute hospital admissions in older people[J].  
481 *British Journal of Health Care Management*, 2013, 18(11):597-603.  
482 'doi':10.12968/bjhc.2012.18.11.597
- 483 17. Gertman P M, Restuccia J D. The appropriateness evaluation protocol: a technique for assessing  
484 unnecessary days of hospital care.[J]. *Medical Care*, 1981, 19(8):855-71.  
485 'doi':10.1097/00005650-198108000-00005

- 1  
2  
3  
4 486 18. Yingchun Chen, Excessive demand for inpatient service in rural areas [M]. 科学出版社, 2014.
- 5 487 19. Leah V, Adams J. Assessment of older adults in the emergency department.[J]. Nursing Standard,  
6 488 2010, 24(46):42. 'doi': 10.7748/ns2010.07.24.46.42.c7911
- 7  
8 489 20. Ingold B B, Yersin B, Wietlisbach V, et al. Characteristics associated with inappropriate hospital  
9 490 use in elderly patients admitted to a general internal medicine service[J]. Aging Clinical &  
10 491 Experimental Research, 2000, 12(6):430-438. 'doi':10.1007/BF03339873
- 11 492 21. Zhang, Y., et al., Determinants of Inappropriate Admissions in County Hospitals in Rural China: A  
12 493 Cross-Sectional Study. Int J Environ Res Public Health, 2018. 15(6).  
13 494 'doi':10.3390/ijerph15061050
- 14  
15 495 22. CHEN Fang-wu, YANG Xu-li, LIU Jie. Analysis on the situation of health service utilization and  
16 496 its influencing factors among aged people[J].Modern Preventive Medicine,2007(16):3083-3085.  
17 497 'doi':10.3969/j.issn.1003-8507.2007.16.037
- 18  
19 498 23. HU HONG-Wei, LUAN Wen-jing, LI Jia-yi. Medical insurance, health Services Utilization and  
20 499 Excessive Demands for Medical Services—The Impact of Medical Insurance on Utilization of  
21 500 Health Service of the elderly [J]. Journal of Shanxi Finance and Economics University,  
22 501 2015,37(05):14-24. 'doi':10.13781/j.cnki.1007-9556.2015.05.002
- 23  
24 502 24. Yan Z, Chen Y, Xiang Z, et al. Current level and determinants of inappropriate admissions to  
25 503 township hospitals under the new rural cooperative medical system in China: a cross-sectional  
26 504 study[J]. BMC Health Services Research, 2014, 14(1):649. 'doi':10.1186/s12913-014-0649-3
- 27  
28 505 25. TANG Yong-xia, LUO Wei-guo. Investigation on Family Status of Women in Poor Rural  
29 506 Areas—With Tongwei County in Dingxi of Gansu as an Example [J]. Journal of University of  
30 507 Science and Technology Beijing (Social Sciences Edition), 2014, 30(4):46-55.  
31 508 'doi':10.3969/j.issn.1008-2689.2014.04.007
- 32  
33 509 26. Tavakoli N, Hosseini Kasnavieh S M, Yasinzadeh M, et al. Evaluation of Appropriate and  
34 510 Inappropriate Admission and Hospitalization Days According to Appropriateness Evaluation  
35 511 Protocol (AEP).[J]. Archives of Iranian Medicine, 2015, 18(7):430-434.
- 36  
37 512 27. Ferrero, B.O.; Sanchez, M.L.; Corredera, R.C.; Uriarte, A.E.; de Miguel, D.L.V.F. Inappropriate  
38 513 admissions to the Department of Internal Medicine evaluated by the AEP (Appropriateness  
39 514 Evaluation Protocol). An Med Interna 1998, 15, 674-675.
- 40  
41 515 28. Mozes, B.; Schiff, E.; Modan, B. Factors affecting inappropriate hospital stay. Quality assurance  
42 516 in health care : the official journal of the International Society for Quality Assurance in Health  
43 517 Care 1991, 3, 211-217. 'doi': 10.1093/intqhc/3.3.211
- 44  
45 518 29. Gan C H, Zhou X, Zheng R G. Imperfect Information, Supplier-induced Demand and Quality of  
46 519 Health Service[J]. Journal of Finance & Economics, 2007.  
47 520 'doi':10.3969/j.issn.1001-9952.2007.08.009
- 48  
49 521 30. Yip, W.C.; Hsiao, W.; Meng, Q.; Chen, W.; Sun, X. Realignment of incentives for health-care  
50 522 providers in China. LANCET 2010, 375, 1120-1130. 'doi':10.1016/S0140-6736(10)60063-3
- 51  
52 523 31. Osinaike, B.B.; Olusanya, O. Inappropriate Intensive Care Unit admissions: Nigerian doctors'  
53 524 perception and attitude. NIGER J CLIN PRACT 2016, 19, 721-724.  
54 525 'doi':10.4103/1119-3077.181354
- 55  
56 526 32. Purdy S, Griffin T. Reducing hospital admissions[J]. Bmj, 2008, 336(7634):4-5.  
57 527 'doi':10.1136/bmj.39394.402465.BE
- 58  
59 528 33. Thwaites R, Glasby J, Le M N, et al. Room for one more? A review of the literature on

- 1  
2  
3 529 'inappropriate' admissions to hospital for older people in the English NHS.[J]. Health & Social  
4 530 Care in the Community, 2017, 5(1):309-15. 'doi':10.1111/hsc.12281  
5 531 34. Sánchez-García S, Juárez-Cedillo T, Mould-Quevedo J F, et al. The hospital appropriateness  
6 532 evaluation protocol in elderly patients: a technique to evaluate admission and hospital stay[J].  
7 533 Scandinavian Journal of Caring Sciences, 2010, 22(2):306-313.  
8 534 'doi':10.1111/j.1471-6712.2007.00528.x ·  
9 535 35. Cardona-Morrell M, Jch K, Brabrand M, et al. What is inappropriate hospital use for elderly  
10 536 people near the end of life? A systematic review[J]. European Journal of Internal Medicine, 2017.  
11 537 'doi': 10.1016/j.ejim.2017.04.014  
12 538 36. Liu W, Yuan S, Wei F, et al. Reliability and Validity of the Chinese Version Appropriateness  
13 539 Evaluation Protocol[J]. Plos One, 2015, 10(8):e0136498. 'doi': 10.1371/journal.pone.0136498  
14  
15  
16

## 17 **Figure Legend**

18  
19 **Figure 1.** Investigation map of rural residents in China.  
20  
21  
22  
23  
24  
25  
26  
27  
28  
29  
30  
31  
32  
33  
34  
35  
36  
37  
38  
39  
40  
41  
42  
43  
44  
45  
46  
47  
48  
49  
50  
51  
52  
53  
54  
55  
56  
57  
58  
59  
60



**STROBE 2007 (v4) Statement—Checklist of items that should be included in reports of *cross-sectional studies***

| Section/Topic                | Item # | Recommendation                                                                                                                                                                       | Reported on page # |
|------------------------------|--------|--------------------------------------------------------------------------------------------------------------------------------------------------------------------------------------|--------------------|
| <b>Title and abstract</b>    | 1      | (a) Indicate the study’s design with a commonly used term in the title or the abstract                                                                                               | 1                  |
|                              |        | (b) Provide in the abstract an informative and balanced summary of what was done and what was found                                                                                  | 2,3                |
| <b>Introduction</b>          |        |                                                                                                                                                                                      |                    |
| Background/rationale         | 2      | Explain the scientific background and rationale for the investigation being reported                                                                                                 | 4                  |
| Objectives                   | 3      | State specific objectives, including any prespecified hypotheses                                                                                                                     | 7                  |
| <b>Methods</b>               |        |                                                                                                                                                                                      |                    |
| Study design                 | 4      | Present key elements of study design early in the paper                                                                                                                              |                    |
| Setting                      | 5      | Describe the setting, locations, and relevant dates, including periods of recruitment, exposure, follow-up, and data collection                                                      | 7                  |
| Participants                 | 6      | (a) Give the eligibility criteria, and the sources and methods of selection of participants                                                                                          | 7                  |
| Variables                    | 7      | Clearly define all outcomes, exposures, predictors, potential confounders, and effect modifiers. Give diagnostic criteria, if applicable                                             | 10                 |
| Data sources/<br>measurement | 8*     | For each variable of interest, give sources of data and details of methods of assessment (measurement). Describe comparability of assessment methods if there is more than one group | 10                 |
| Bias                         | 9      | Describe any efforts to address potential sources of bias                                                                                                                            |                    |
| Study size                   | 10     | Explain how the study size was arrived at                                                                                                                                            | 9                  |
| Quantitative variables       | 11     | Explain how quantitative variables were handled in the analyses. If applicable, describe which groupings were chosen and why                                                         | 10                 |
| Statistical methods          | 12     | (a) Describe all statistical methods, including those used to control for confounding                                                                                                | 10                 |
|                              |        | (b) Describe any methods used to examine subgroups and interactions                                                                                                                  | 11                 |
|                              |        | (c) Explain how missing data were addressed                                                                                                                                          |                    |
|                              |        | (d) If applicable, describe analytical methods taking account of sampling strategy                                                                                                   |                    |
|                              |        | (e) Describe any sensitivity analyses                                                                                                                                                |                    |
| <b>Results</b>               |        |                                                                                                                                                                                      |                    |

|                          |     |                                                                                                                                                                                                                                                                                                                                                                                                               |                |
|--------------------------|-----|---------------------------------------------------------------------------------------------------------------------------------------------------------------------------------------------------------------------------------------------------------------------------------------------------------------------------------------------------------------------------------------------------------------|----------------|
| Participants             | 13* | (a) Report numbers of individuals at each stage of study—eg numbers potentially eligible, examined for eligibility, confirmed eligible, included in the study, completing follow-up, and analysed<br>(b) Give reasons for non-participation at each stage<br>(c) Consider use of a flow diagram                                                                                                               | 12             |
| Descriptive data         | 14* | (a) Give characteristics of study participants (eg demographic, clinical, social) and information on exposures and potential confounders<br>(b) Indicate number of participants with missing data for each variable of interest                                                                                                                                                                               | 12             |
| Outcome data             | 15* | Report numbers of outcome events or summary measures                                                                                                                                                                                                                                                                                                                                                          | 14,15          |
| Main results             | 16  | (a) Give unadjusted estimates and, if applicable, confounder-adjusted estimates and their precision (eg, 95% confidence interval). Make clear which confounders were adjusted for and why they were included<br>(b) Report category boundaries when continuous variables were categorized<br>(c) If relevant, consider translating estimates of relative risk into absolute risk for a meaningful time period | 16,17<br>14,15 |
| Other analyses           | 17  | Report other analyses done—eg analyses of subgroups and interactions, and sensitivity analyses                                                                                                                                                                                                                                                                                                                | 16             |
| <b>Discussion</b>        |     |                                                                                                                                                                                                                                                                                                                                                                                                               |                |
| Key results              | 18  | Summarise key results with reference to study objectives                                                                                                                                                                                                                                                                                                                                                      | 18—22          |
| Limitations              | 19  | Discuss limitations of the study, taking into account sources of potential bias or imprecision. Discuss both direction and magnitude of any potential bias                                                                                                                                                                                                                                                    | 23             |
| Interpretation           | 20  | Give a cautious overall interpretation of results considering objectives, limitations, multiplicity of analyses, results from similar studies, and other relevant evidence                                                                                                                                                                                                                                    | 18—22          |
| Generalisability         | 21  | Discuss the generalisability (external validity) of the study results                                                                                                                                                                                                                                                                                                                                         |                |
| <b>Other information</b> |     |                                                                                                                                                                                                                                                                                                                                                                                                               |                |
| Funding                  | 22  | Give the source of funding and the role of the funders for the present study and, if applicable, for the original study on which the present article is based                                                                                                                                                                                                                                                 | 24             |

\*Give information separately for cases and controls in case-control studies and, if applicable, for exposed and unexposed groups in cohort and cross-sectional studies.

**Note:** An Explanation and Elaboration article discusses each checklist item and gives methodological background and published examples of transparent reporting. The STROBE checklist is best used in conjunction with this article (freely available on the Web sites of PLoS Medicine at <http://www.plosmedicine.org/>, Annals of Internal Medicine at <http://www.annals.org/>, and Epidemiology at <http://www.epidem.com/>). Information on the STROBE Initiative is available at [www.strobe-statement.org](http://www.strobe-statement.org).

# BMJ Open

## Determinants of Inappropriate Admission of Elderly People in County-Level Hospitals: A Cross-Sectional Study in Rural China

|                                 |                                                                                                                                                                                                                                                                                                                                                                                                                                                                                                                                                                                                                                                                                                                                                                                                                                                                                                                                                                                                                                                                                                                                                                                                                                                                                                                                                                                                                                                                                                                                                                                                                                                                                                                                                                                                                                                                                                                                                                                                                                                                                                                                                                                                                                                                                                                                                              |
|---------------------------------|--------------------------------------------------------------------------------------------------------------------------------------------------------------------------------------------------------------------------------------------------------------------------------------------------------------------------------------------------------------------------------------------------------------------------------------------------------------------------------------------------------------------------------------------------------------------------------------------------------------------------------------------------------------------------------------------------------------------------------------------------------------------------------------------------------------------------------------------------------------------------------------------------------------------------------------------------------------------------------------------------------------------------------------------------------------------------------------------------------------------------------------------------------------------------------------------------------------------------------------------------------------------------------------------------------------------------------------------------------------------------------------------------------------------------------------------------------------------------------------------------------------------------------------------------------------------------------------------------------------------------------------------------------------------------------------------------------------------------------------------------------------------------------------------------------------------------------------------------------------------------------------------------------------------------------------------------------------------------------------------------------------------------------------------------------------------------------------------------------------------------------------------------------------------------------------------------------------------------------------------------------------------------------------------------------------------------------------------------------------|
| Journal:                        | <i>BMJ Open</i>                                                                                                                                                                                                                                                                                                                                                                                                                                                                                                                                                                                                                                                                                                                                                                                                                                                                                                                                                                                                                                                                                                                                                                                                                                                                                                                                                                                                                                                                                                                                                                                                                                                                                                                                                                                                                                                                                                                                                                                                                                                                                                                                                                                                                                                                                                                                              |
| Manuscript ID                   | bmjopen-2018-026443.R1                                                                                                                                                                                                                                                                                                                                                                                                                                                                                                                                                                                                                                                                                                                                                                                                                                                                                                                                                                                                                                                                                                                                                                                                                                                                                                                                                                                                                                                                                                                                                                                                                                                                                                                                                                                                                                                                                                                                                                                                                                                                                                                                                                                                                                                                                                                                       |
| Article Type:                   | Research                                                                                                                                                                                                                                                                                                                                                                                                                                                                                                                                                                                                                                                                                                                                                                                                                                                                                                                                                                                                                                                                                                                                                                                                                                                                                                                                                                                                                                                                                                                                                                                                                                                                                                                                                                                                                                                                                                                                                                                                                                                                                                                                                                                                                                                                                                                                                     |
| Date Submitted by the Author:   | 19-Feb-2019                                                                                                                                                                                                                                                                                                                                                                                                                                                                                                                                                                                                                                                                                                                                                                                                                                                                                                                                                                                                                                                                                                                                                                                                                                                                                                                                                                                                                                                                                                                                                                                                                                                                                                                                                                                                                                                                                                                                                                                                                                                                                                                                                                                                                                                                                                                                                  |
| Complete List of Authors:       | <p>Hu, Xiaomei; School of Medicine and Health Management, Tongji Medical College, Huazhong University of Science and Technology; Research Center for Rural Health Service, Key Research Institute of Humanities &amp; Social Sciences of Hubei Province</p> <p>Gao, Hongxia; School of Medicine and Health Management, Tongji Medical College, Huazhong University of Science and Technology; Research Center for Rural Health Service, Key Research Institute of Humanities &amp; Social Sciences of Hubei Province</p> <p>Zhang, Yan; School of Medicine and Health Management, Tongji Medical College, Huazhong University of Science and Technology; Research Center for Rural Health Service, Key Research Institute of Humanities &amp; Social Sciences of Hubei Province</p> <p>Li, Haomiao; School of Medicine and Health Management, Tongji Medical College, Huazhong University of Science and Technology; Research Center for Rural Health Service, Key Research Institute of Humanities &amp; Social Sciences of Hubei Province</p> <p>Su, Dai; School of Medicine and Health Management, Tongji Medical College, Huazhong University of Science and Technology; Research Center for Rural Health Service, Key Research Institute of Humanities &amp; Social Sciences of Hubei Province</p> <p>Chang, Jingjing; School of Medicine and Health Management, Tongji Medical College, Huazhong University of Science and Technology; Research Center for Rural Health Service, Key Research Institute of Humanities &amp; Social Sciences of Hubei Province</p> <p>Jiang, Di; School of Medicine and Health Management, Tongji Medical College, Huazhong University of Science and Technology; Research Center for Rural Health Service, Key Research Institute of Humanities &amp; Social Sciences of Hubei Province</p> <p>Lei, Shihan; School of Medicine and Health Management, Tongji Medical College, Huazhong University of Science and Technology; Research Center for Rural Health Service, Key Research Institute of Humanities &amp; Social Sciences of Hubei Province</p> <p>Chen, Yingchun; School of Medicine and Health Management, Tongji Medical College, Huazhong University of Science and Technology; Research Center for Rural Health Service, Key Research Institute of Humanities &amp; Social Sciences of Hubei Province</p> |
| <b>Primary Subject Heading</b>: | Health policy                                                                                                                                                                                                                                                                                                                                                                                                                                                                                                                                                                                                                                                                                                                                                                                                                                                                                                                                                                                                                                                                                                                                                                                                                                                                                                                                                                                                                                                                                                                                                                                                                                                                                                                                                                                                                                                                                                                                                                                                                                                                                                                                                                                                                                                                                                                                                |

1  
2  
3  
4  
5  
6  
7  
8  
9  
10  
11  
12  
13  
14  
15  
16  
17  
18  
19  
20  
21  
22  
23  
24  
25  
26  
27  
28  
29  
30  
31  
32  
33  
34  
35  
36  
37  
38  
39  
40  
41  
42  
43  
44  
45  
46  
47  
48  
49  
50  
51  
52  
53  
54  
55  
56  
57  
58  
59  
60

|                            |                                                                                                                                                                                  |
|----------------------------|----------------------------------------------------------------------------------------------------------------------------------------------------------------------------------|
| Secondary Subject Heading: | Health policy                                                                                                                                                                    |
| Keywords:                  | Health policy < HEALTH SERVICES ADMINISTRATION & MANAGEMENT, Quality in health care < HEALTH SERVICES ADMINISTRATION & MANAGEMENT, inappropriate admission, elderly, rural China |
|                            |                                                                                                                                                                                  |

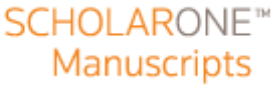

1 **Determinants of Inappropriate Admission of Elderly People in**  
2 **County-Level Hospitals: A Cross-Sectional Study in Rural China**

3 Xiaomei Hu<sup>1,2+</sup>, Hongxia Gao<sup>1,2+</sup>, Yan Zhang<sup>1,2</sup>, Haomiao Li<sup>1,2</sup>, Dai Su<sup>1,2</sup>,  
4 Jingjing Chang<sup>1,2</sup>, Di Jiang<sup>1,2</sup>, Shihan Lei<sup>1,2</sup>, Yingchun Chen<sup>1,2</sup> §

5  
6 <sup>1</sup> School of Medicine and Health Management, Tongji Medical College, Huazhong  
7 University of Science and Technology, Wuhan, Hubei, 430030, China

8 <sup>2</sup> Research Centre for Rural Health Service, Key Research Institute of Humanities &  
9 Social Sciences of Hubei Provincial Department of Education, Wuhan, Hubei,  
10 430030, China

11  
12 **Email addresses:**

|    |        |                |       |                           |
|----|--------|----------------|-------|---------------------------|
| 13 | X-M.H. | Xiaomei Hu     | M.D.  | huxiaomei@hust.edu.cn     |
| 14 | H-X.G. | Hongxia Gao    | Ph.D. | gaohongxia@hust.edu.cn    |
| 15 | Y.Z    | Yan Zhang      | Ph.D. | yanzhang@hust.edu.cn      |
| 16 | H-M.L  | Haomiao Li     | Ph.D. | lihaomiao@hust.edu.cn     |
| 17 | D.S.   | Dai Su         | Ph.D. | sudai@hust.edu.cn         |
| 18 | J-J.C. | Jingjing Chang | Ph.D. | changjingjing@hust.edu.cn |
| 19 | D-J    | Di Jiang       | M.D.  | jiangdi@hust.edu.cn       |
| 20 | S-H.L. | Shihan Lei     | M.D.  | leishihan@hust.edu.cn     |
| 21 | Y-C.C. | Yingchun Chen  | Ph.D. | chenyingchun@hust.edu.cn  |

1  
2  
3  
4 22 \* **Equal contributors:**  
5

6 23 X-M.H and H-X.G contributed equally to the development of this research study.  
7  
8

9 24 § **Corresponding author:**  
10

11 25 Yingchun Chen, chenyingchun@hust.edu.cn  
12  
13  
14

15 26 **Abstract**  
16

17  
18 27 **Objective** The purpose of this paper is to investigate the characteristics and  
19  
20  
21 28 determinants of inappropriate admission to hospital of elderly people in rural China.  
22

23  
24 29 **Design** A cross-sectional study was conducted, wherein a comparison between elderly  
25  
26 30 and non-elderly groups was conducted.  
27

28  
29 31 **Setting** The survey was conducted on the largest county-level general hospitals in  
30  
31 32 four counties in central and western China.  
32

33  
34 33 **Participants** A total of 652 rural patients admitted in hospitals were surveyed, of  
35  
36 34 which were divided into two groups according to age: elderly group (N=230, age $\geq$ 60),  
37  
38 35 and non-elderly group (N=422, age $<$ 60).  
39

40  
41 36 **Primary measures** The Chinese version of the appropriateness evaluation protocol  
42  
43 37 was used to evaluate the inappropriate admission rates. The interactive regression  
44  
45 38 models based on the relationship of age (elderly and non-elderly) with other factors  
46  
47 39 and binary logistic regression models were used in the analysis of the specific factors  
48  
49 40 and determinants of the inappropriate admission of elderly people.  
50

51  
52  
53 41 **Result** The inappropriate admission rate for rural elderly was 30%, which was lower  
54  
55 42 than that of non-elderly people (40.8%). Compared with the non-elderly group,  
56  
57  
58  
59  
60

1  
2  
3  
4 43 women in the elderly group (OR=0.33, 95%CI: 0.15-0.73) had a lower incidence of  
5  
6  
7 44 inappropriate admission, and elderly people with chronic diseases (OR=3.33, 95%CI:  
8  
9 45 1.23 -9.04) were more prone to inappropriately admitted than non-elderly people with  
10  
11  
12 46 chronic diseases. The binary logistic regression analysis shows that county, age  
13  
14 47 (OR=0.94, 95%CI: 0.90 -0.99), gender (OR=0.49, 95%CI: 0.25 -2.98), department  
15  
16  
17 48 and response to doctor's admission request were the determinants of the inappropriate  
18  
19  
20 49 admission of elderly patients.

21  
22 50 **Conclusion** The inappropriate admission rate of elderly people in rural China was  
23  
24  
25 51 high. We found that gender and chronic disease are the specific factors that were  
26  
27  
28 52 specific to non-elderly people. County, age, gender, department and response to a  
29  
30  
31 53 doctor's admission request had substantial influence on the inappropriate admission of  
32  
33  
34 54 elderly in rural China.

### 35 36 37 55 **Strengths and limitation of this study**

- 38  
39  
40 56 1. To the best of our knowledge, this is the first in-depth study of the inappropriate  
41  
42 57 admission of elderly people in rural areas in China.
- 43  
44  
45 58 2. The inclusion of non-elderly people for comparative analysis emphasised the  
46  
47 59 specificity of the inappropriate hospital admission of elderly people.
- 48  
49  
50 60 3. In the search for determinants of inappropriate admission to the elderly, social  
51  
52 61 demographics, objective admission status and subjective cognitive status were all  
53  
54  
55 62 included.
- 56  
57  
58 63 4. This cross-sectional study design cannot determine the causal relationship  
59  
60

64 between the inappropriate hospital admission of elderly people and related factors.

65 5. The appropriateness evaluation protocol applicable to the entire population may

66 not be the best tool for evaluating the inappropriate admission of elderly people.

## 67 **Introduction**

68 Aging is a severe challenge facing the Chinese society today. At the end of 2017,

69 China's elderly population aged 60 years and above was 241 million, accounting for

70 17.3% of the total population [1]. In recent years, the rate of hospitalisation for the

71 elderly in rural China has increased from 12.7% in 2003 to 21.5% in 2013 [2], which

72 suggests that the utilization of health services for rural elderly population in China has

73 increased sharply. And the inappropriate admission rate of people over 60 years in

74 rural China has reached 23.2% [3]. The inappropriateness of the elderly's health

75 demand has become a major concern in the supply of health services in China.

76 Inappropriate admission refers to the unnecessary hospitalisation of patients [4,5],

77 which is one of the main forms of excessive demand for hospitalisation services [6].

78 Some special national conditions in China determine that the reason for the

79 inappropriate admission of elderly people in rural China differs from that in other

80 countries. On the one hand, primary health care is backward in rural China, especially

81 family doctor system, which remains far from perfect. Hence, elderly patients lack the

82 correct guidance for their first visit although their cognitive levels decrease with age

83 [7] On the other hand, China's institutional endowment system remains imperfect, and

84 hospitalisation services have become the main sources of nursing services for the



1  
2  
3  
4 85 elderly who suffer from chronic diseases and poor health<sup>[8]</sup>. Both of these aspects are  
5  
6  
7 86 related to the inappropriate admission behavior of the elderly. In recent years, the  
8  
9  
10 87 Chinese government has adopted various reform measures that are aimed at guiding  
11  
12 88 patients seeking correct medical care; these measures include the implementation of  
13  
14 89 basic medical insurance payment reform<sup>[9]</sup>, hierarchical medical system and family  
15  
16  
17 90 doctor contracted services. However, inappropriate inpatient service utilization for the  
18  
19  
20 91 elderly remains a problem in rural China.

21  
22 92 Inappropriate admission not only wastes health resources but also further increases the  
23  
24  
25 93 economic burden of the elderly in rural areas. It also increases the risk of hospital-  
26  
27  
28 94 acquired infections in elderly people, thereby compromising patients safety and health  
29  
30  
31 95 <sup>[10,11]</sup>. Therefore, identifying the determinants of inappropriate hospitalisation is a  
32  
33 96 useful approach for the formulation of targeted interventions that can reduce  
34  
35  
36 97 inappropriate hospital admission rates and improve the efficiencies and qualities of  
37  
38  
39 98 hospitalisation services.

40  
41 99 The international study on the inappropriate admission of the elderly is mainly  
42  
43  
44 100 focused on the evaluation of the rate, characteristics and impact factors of  
45  
46  
47 101 inappropriate admission in hospitals. Influencing factors are mainly considered from  
48  
49  
50 102 the perspective of individual characteristics and supplier side. The comprehensive  
51  
52 103 consideration of both supply and demand factors are often undermined in most  
53  
54  
55 104 studies. The analysis of individual characteristics generally focuses on diseases and  
56  
57 105 severity of illness in hospitalised elderly patients. Gamper et al.<sup>[12]</sup> found that elderly  
58  
59  
60 106 people with chronic diseases are more likely to be inappropriately admitted. Menand

1  
2  
3  
4 107 et al. <sup>[13]</sup> found that the severity of illness and mention of a cardiac disease are  
5  
6 108 associated with the inappropriate admission of people aged 80 years. The analysis of  
7  
8  
9 109 influencing factors from the supplier side mainly focuses on the decision-making of  
10  
11  
12 110 medical service providers and primary health care. Aida et al. <sup>[14]</sup> showed that the  
13  
14 111 inappropriate admission of elderly people over 65 years old in southern Italy is mainly  
15  
16  
17 112 influenced by conservative admission treatment decision, which is made by doctors or  
18  
19  
20 113 hospital managers to avoid the risk of medical accidents. Mytton et al. <sup>[15]</sup> found that,  
21  
22 114 in the United Kingdom, the inappropriate admission of elderly people to the  
23  
24  
25 115 emergency departments of hospitals depends on the quality of doctor admission  
26  
27  
28 116 decisions and the capacities of community health services. Presently, there were rarely  
29  
30  
31 117 researches concerning about the inappropriate admission of the elderly in China ,and  
32  
33 118 the only study's analysis only covered the descriptive analysis phase, and the effect of  
34  
35  
36 119 the factors remains unclear. We assume that the appropriateness of admission of  
37  
38 120 elderly people is influenced by both the supply and demand sides.  
39  
40  
41 121 Therefore, we aims to identify the rate and determinants of inappropriate admission of  
42  
43  
44 122 elderly people to hospitals in rural China from the perspective of supply and demand  
45  
46  
47 123 and to provide targeted strategies for the intervention and control of the  
48  
49 124 hospitalisation behaviours of elderly people.  
50

## 51 125 **Methods**

### 52 126 **Setting and participants**

53  
54  
55 127 This cross-sectional study was conducted in 2017, and cluster random sampling was  
56  
57  
58  
59  
60

1  
2  
3  
4 128 adopted. Four counties in central and western China, namely, Dingyuan in Anhui  
5  
6 129 Province, Huining and Weiyuan in Gansu Province and Yilong in Sichuan Province,  
7  
8  
9 130 were selected as sample counties. The counties in eastern China were not included  
10  
11  
12 131 because most counties are shifting to the urban district level through rapid economic  
13  
14 132 and social development. The largest county-level general hospital in each county was  
15  
16  
17 133 surveyed, and the respondents were hospitalised patients in rural households who  
18  
19  
20 134 were grouped into the elderly group (aged 60 years and older) and non-elderly groups  
21  
22  
23 135 (under 60 years old).

### 24 25 136 **Sampling and data collection**

26  
27  
28 137 For the calculation of sample size, it is estimated that the inappropriate admission rate  
29  
30 138  $P$  of in rural areas is 25%, the absolute tolerance  $\delta=0.035$  and the confidence level is  
31  
32  
33 139 95% ( $\alpha=0.05$ ):

$$34  
35  
36 140 N=Z_{\alpha/2}^2 \times P(1 - P) / \delta^2 = 1.96^2 \times 0.25 \times (1-0.25) / 0.035^2 = 588$$

37  
38 141 Through a cluster sampling method, 170 rural patients in each county hospital were  
39  
40  
41 142 randomly selected. The responses were obtained through the use of questionnaire  
42  
43 143 surveys, and their medical records were collected after they were discharged. To ensure  
44  
45  
46 144 the integrity of the data for each indicator, we excluded the unqualified sample records.  
47  
48  
49 145 Of the 680 records collected, 652 valid records were finally retained, including 230 for  
50  
51  
52 146 the elderly and 422 for the non-elderly.

### 53 54 147 **Measurement**

55  
56  
57 148 With the consent of the hospital and the patients, a structured questionnaire survey was  
58  
59  
60 149 used, which included inquiries about demographic characteristics and subjective

1  
2  
3  
4 150 cognitive indicators. Their medical records were extracted for the collection of  
5  
6  
7 151 objective admission statuses and evaluation of the appropriateness of admission.  
8

9 152 **Variables**

10  
11  
12 153 The outcome variable was the appropriateness of admission to the hospital, with  
13  
14 154 appropriate admission = 0 and inappropriate admission = 1.

15  
16  
17 155 The independent variables mainly include demographic characteristics (e.g., county,  
18  
19  
20 156 gender and age), subjective cognitive status (e.g., response to doctor's admission  
21  
22 157 request (RTDAR), disease severity, affordability to hospitalisation costs, comparison of  
23  
24  
25 158 inpatient and outpatient reimbursement ( CORR ) and hospitalisation convenience)  
26  
27  
28 159 and objective admission status (e.g., department, disease, health status and diagnosis of  
29  
30 160 chronic diseases (DOCD)). Among the above variables, gender, age, subjective  
31  
32  
33 161 cognitive, disease, health status and DOCD are from the demand's perspective, while  
34  
35  
36 162 county, RTDAR, affordability to hospitalisation costs, CORR, hospitalisation  
37  
38  
39 163 convenience, department and DOCD can also directly or indirectly reflect the influence  
40  
41 164 of the supplier on the inappropriate admission of the elderly.

42  
43  
44 165 **Records appropriateness evaluation**

45  
46 166 The appropriateness evaluation protocol (AEP) <sup>[16]</sup> is widely used in the evaluation of  
47  
48  
49 167 the appropriateness of admission. Yingchun Chen <sup>[17]</sup> developed an identification tool,  
50  
51  
52 168 R-AEP, which is suitable for the appropriateness of admission to hospitals operating in  
53  
54  
55 169 rural China (Additional file1 for details).

56  
57 170 The R-AEP criteria were used in the evaluation of the appropriateness of admission in  
58  
59 171 652 cases. The evaluation was performed by professionally trained personnel. These

1  
2  
3  
4 172 highly trained personnel were professionals in health policy research, all of whom  
5  
6 173 received Ph.D. degrees and committed to making fair judgments on records in a strictly  
7  
8  
9 174 standard manner. The R-AEP criteria were are based on the value of the medical record.  
10  
11  
12 175 Therefore, all R-AEP related indicators were extracted, and their actual values were  
13  
14 176 compared with standard values. The record for indicator actual values that match with  
15  
16  
17 177 the standard value was considered appropriate. Medical records with all relevant values  
18  
19  
20 178 that did not meet the AEP criteria were considered as inappropriate admission. The  
21  
22  
23 179 specific case evaluation process was as follows: 1) Evaluating each medical record by  
24  
25 180 two experts; 2) Comparing the consistency of the results of the two experts; 3) Cases  
26  
27  
28 181 with inconsistent results from two experts were sent to a third party and were evaluated  
29  
30  
31 182 by a third party; 4) Comparing the results of admission appropriateness made by a third  
32  
33  
34 183 party with the previous results and making the final judgment about appropriateness of  
35  
36 184 patient admission.

### 185 **Statistics analysis**

186 The demographic characteristics, subjective cognitive status and objective admission  
187 status were processed via Epidata 3.2. Diseases were categorised using the International  
188 Classification of Diseases 10th revision (ICD-10).  
189 IBM SPSS Statistics 22.0 was used for statistical analysis. The *t* test and Person's chi-  
190 square test were used in the analysis of the distribution characteristics of inappropriate  
191 admission of the elderly. For the 652 respondents, the interactive logistic regression  
192 model based on the relationship of age (elderly and non-elderly) with other factors was  
193 adopted for the analysis of the specific factors affecting the inappropriate admission of

1  
2  
3  
4 194 elderly people in comparison with those affecting the inappropriate admission of non-  
5  
6 195 elderly people. Taking the appropriateness of admission as the dependent variable, we  
7  
8  
9 196 directly included the main effect of the independent variable to the regression model,  
10  
11  
12 197 and the interaction effect was screened into the model by stepwise regression. Finally,  
13  
14  
15 198 the model was formed.

17 199  $Logit (P) = \beta_0 + \beta_1 County + \beta_2 Age + \beta_3 Gender + \beta_4 Disease + \beta_5 Department + \beta_6 DOCD$   
18  
19  
20 200  $+ \beta_7 Health\ status + \beta_8 RTDAR + \beta_9 Severity + \beta_{10} CORR + \beta_{11} Affordability$   
21  
22  
23 201  $+ \beta_{12} Hospitalization\ convenience + \beta_{13} Age \times Gender + \beta_{14} Age \times DOCD + \varepsilon$

24  
25 202 For 230 elderly respondents, binary logistic regression analysis was used for the  
26  
27  
28 203 identification of the determinants of the inappropriate admission of the elderly. The  
29  
30  
31 204 patient admission appropriateness was the dependent variable, and the independent  
32  
33  
34 205 variable was selected using the stepwise regression. The regression model is as follows:

35  
36 206  $Logit (P) = \beta_0 + \beta_1 County + \beta_2 Age + \beta_3 Gender + \beta_4 Department + \beta_5 RTDAR + \beta_6 Affordability + \varepsilon$

### 37 38 207 **Patient and public involvement**

39  
40  
41 208 Patients were not involved in the development of the study. The results were  
42  
43  
44 209 applicable for publication in a peer-reviewed journal. There is no plan to specifically  
45  
46  
47 210 disseminate the findings to study participants.

### 48 49 211 **Research Ethics**

50  
51  
52 212 The research methods and investigation tools in this study were approved by the  
53  
54  
55 213 Ethics Committee of Tongji Medical College, Huazhong University of Science and

1  
2  
3  
4 214 Technology (IORG No: IORG0003571). The patient information was not disclosed  
5  
6  
7 215 before the analysis.  
8  
9

## 10 216 **Result**

### 11 12 13 217 *Selected characteristics of the study population*

14  
15  
16 218 The study included 652 admitted patients, of which 230 were elderly patients (average  
17  
18 219 age: 70.73 years old, female: 52.6%), and 422 were non-elderly patients (average age:  
19  
20 220 28.33 years old, female: 49.3%). The sampling rates in each hospital were 0.53% in  
21  
22  
23 221 Yilong (samplers in annual hospitalizations in 2017: 157 in 29461), 0.54% in Huining  
24  
25 222 (153 in 28101), 0.28% in Dingyuan (176 in 62096) and 1.41% in Weiyuan (166 in  
26  
27  
28 223 11734). The selected characteristics of the study population are shown in Tables 1 and  
29  
30  
31 224 2. Most of the elderly patients were hospitalized in internal medicine (79.1%) and were  
32  
33 225 admitted because of circulatory diseases (43.9%). Only 43.9% of the elderly patients  
34  
35 226 were in good health, and the majority of the patients have chronic diseases (74.3%).  
36  
37 227 Older patients had a higher expectation of admission and always think that their  
38  
39 228 respective diseases are serious. The number of elderly patients who considered the  
40  
41 229 reimbursement of inpatient was higher than that of outpatient, which account for only  
42  
43 230 43.9% of the elderly respondents. Only 32.2% of elderly patients thought that they can  
44  
45 231 fully pay for the hospitalisation, and 49.6% considered that hospitalisation is  
46  
47 232 inconvenient.  
48  
49 233 Of the 230 elderly patients surveyed, 69 were inappropriately admitted, with the rate of  
50  
51 234 30%, which was lower than that of non-elderly patients (40.8%). The inappropriate  
52  
53  
54  
55  
56  
57  
58  
59  
60

1  
2  
3  
4 235 admission rate of elderly people in Dingyuan was the highest (51.8%), whereas the  
5  
6 236 lowest was in Yilong (14.5%); the difference between the four counties was statistically  
7  
8  
9 237 significant ( $\chi^2=22.8$ ,  $P<0.001$ ).

### 12 238 *Characteristics of inappropriate admission to the elderly*

14 239 The objective admission indicators of elderly patients (Table 1) show no significant  
15  
16  
17 240 difference in the distribution of admission appropriateness among gender, age,  
18  
19  
20 241 department, disease, health status and diagnosis of chronic diseases. For the non-elderly  
21  
22  
23 242 group, a younger age correspond to higher inappropriate admission rate ( $P<0.001$ ).  
24  
25 243 Moreover, pediatric patients with the highest inappropriate admission rate ( $\chi^2=55.742$ ,  
26  
27  
28 244  $P<0.001$ ) and patients with chronic diseases are more likely to be inappropriately  
29  
30  
31 245 admitted ( $\chi^2=9.092$ ,  $P=0.003$ ).

33 246 The characteristics of inappropriate admission under patients' subjective perceptions is  
34  
35  
36 247 indicated in Table 2. The inappropriate admission rate of elderly patients varies with the  
37  
38  
39 248 different comparison of the reimbursement of inpatient and outpatient ( $\chi^2=11.8$ ,  
40  
41 249  $P=0.003$ ). The number of elderly patients who think that the reimbursement of inpatient  
42  
43  
44 250 is higher than that of outpatient had the highest rate of inappropriate admission (43.9%).  
45  
46 251 Moreover, the affordability of older patients to hospitalisation costs was significantly  
47  
48  
49 252 associated with inappropriate admission ( $\chi^2=9.52$ ,  $P=0.009$ ). Elderly patients who  
50  
51  
52 253 affords the hospitalisation cost difficult had the lowest inappropriate admission rate  
53  
54  
55 254 (38.3%). No statistical difference was found in the distribution of admission  
56  
57  
58 255 appropriateness of the elderly among the response to doctor's admission request, the  
59  
60 256 disease severity and hospitalisation convenience.



257 In the non-elderly group, patients who decided to be admitted to hospitals on their own  
 258 had a higher inappropriate admission rate than those whose decision was made by  
 259 someone else ( $\chi^2=14.258, P=0.007$ ). Patients who think that the reimbursement of  
 260 inpatient is higher than that of outpatient had the highest rate of inappropriate admission  
 261 ( $\chi^2=11.542, P=0.003$ ), and the results were consistent with those in the elderly group.

262 **Table 1 The distribution of inappropriate Admission characteristics of patients according**  
 263 **to the medical records**

| Variable                  | elderly         |                          |                           |        | non-elderly     |                          |                           |         |
|---------------------------|-----------------|--------------------------|---------------------------|--------|-----------------|--------------------------|---------------------------|---------|
|                           | N<br>(column %) | Appropriate<br>N(line %) | Inappropriate<br>N(line%) | P      | N<br>(column %) | Appropriate<br>N(line %) | Inappropriate<br>N(line%) | P       |
| All                       | 230             | 161(70.0)                | 69(30.0)                  |        | 422             | 250(59.2)                | 172(40.8)                 |         |
| County                    |                 |                          |                           |        |                 |                          |                           |         |
| Yilong                    | 62(27.0)        | 53(85.5)                 | 9(14.5)                   | <0.001 | 95(22.5)        | 64(67.4)                 | 31(32.6)                  | <0.001  |
| Huining                   | 61(26.5)        | 48(78.7)                 | 13(21.3)                  |        | 92(21.8)        | 65(70.7)                 | 27(29.3)                  |         |
| Dingyuan                  | 56(24.3)        | 27(48.2)                 | 29(51.8)                  |        | 120(28.4)       | 47(39.2)                 | 73(60.8)                  |         |
| Weiyuan                   | 51(22.2)        | 33(64.7)                 | 18(35.3)                  |        | 115(27.3)       | 74(64.3)                 | 41(35.7)                  |         |
| Gender                    |                 |                          |                           |        |                 |                          |                           |         |
| Male                      | 109(47.4)       | 71(65.1)                 | 38(34.9)                  | 0.127  | 214(50.7)       | 133(62.1)                | 81(37.9)                  | 0.218   |
| Female                    | 121(52.6)       | 90(74.4)                 | 31(25.6)                  |        | 208(49.3)       | 117(56.3)                | 91(43.8)                  |         |
| Age, Mean±SD <sup>a</sup> | 70.73±7.841     | 70.9±7.566               | 70.20±7.305               | 0.485* | 28.33±21.34     | 33.47±19.332             | 24.33±22.600              | <0.001* |
| Department                |                 |                          |                           |        |                 |                          |                           |         |
| Internal medicine         | 182(79.1)       | 125(68.7)                | 57(31.3)                  | 0.155  | 149(35.3)       | 97(65.1)                 | 52(34.9)                  | <0.001  |
| Surgery                   | 34(14.8)        | 28(82.4)                 | 6(17.6)                   |        | 70(16.6)        | 62(88.6)                 | 8(11.4)                   |         |
| Peadiatric                | 0(0.0)          | 0                        | 0                         |        | 154(36.5)       | 59(38.3)                 | 95(61.7)                  |         |
| Others                    | 14(6.1)         | 8(57.1)                  | 6(42.9)                   |        | 49(11.6)        | 32(65.3)                 | 17(34.7)                  |         |
| Disease category          |                 |                          |                           |        |                 |                          |                           |         |
| Circulatory disease       | 101(43.9)       | 70(39.3)                 | 32(30.7)                  | 0.271  | 88(20.9)        | 54(61.4)                 | 34(38.6)                  | 0.084   |
| Respiratory disease       | 18(7.8)         | 15(83.3)                 | 3(16.7)                   |        | 77(18.2)        | 47(61.0)                 | 30(39.0)                  |         |
| Digestive disease         | 23(10.0)        | 14(60.9)                 | 9(39.1)                   |        | 60(14.2)        | 33(55.0)                 | 27(45.0)                  |         |
| Urinary disease           | 5(2.2)          | 4(80.0)                  | 1(20.0)                   |        | 20(4.7)         | 15(75.0)                 | 5(25.0)                   |         |
| Endocrinology diseases    | 16(7.0)         | 9(56.3)                  | 7(43.8)                   |        | 18(4.3)         | 12(66.7)                 | 6(33.3)                   |         |
| Bones and muscles         | 6(2.6)          | 3(50.0)                  | 3(50.0)                   |        | 17(4.0)         | 8(47.1)                  | 9(52.9)                   |         |
| Injury and poisoning      | 10(4.3)         | 10(100.0)                | 0(0.0)                    |        | 22(5.2)         | 19(86.4)                 | 3(13.6)                   |         |
| Symptoms and signs        | 38(16.5)        | 26(68.4)                 | 12(31.6)                  |        | 62(14.7)        | 33(53.2)                 | 29(46.8)                  |         |
| Others                    | 13(5.7)         | 10(76.9)                 | 15(23.1)                  |        | 58(13.7)        | 29(50.0)                 | 29(50.0)                  |         |
| Health status             |                 |                          |                           |        |                 |                          |                           |         |
| Good                      | 101(43.9)       | 71(70.3)                 | 30(29.7)                  | 0.98   | 324(76.8)       | 183(56.5)                | 141(43.5)                 | 0.101   |

|   |         |           |           |          |       |           |           |          |
|---|---------|-----------|-----------|----------|-------|-----------|-----------|----------|
| 1 |         |           |           |          |       |           |           |          |
| 2 |         |           |           |          |       |           |           |          |
| 3 | General | 108(47.0) | 75(69.4)  | 33(30.6) |       | 83(19.7)  | 56(67.5)  | 27(32.5) |
| 4 | Poor    | 21(9.1)   | 15(71.4)  | 6(28.6)  |       | 15(3.6)   |           |          |
| 5 | DOCD    |           |           |          |       |           |           |          |
| 6 | Yes     | 171(74.3) | 117(68.4) | 54(31.6) | 0.414 | 179(42.4) | 91(50.8)  | 88(49.2) |
| 7 | No      | 59(25.7)  | 44(74.6)  | 15(25.4) |       | 243(57.6) | 159(65.4) | 84(34.6) |

10 Note: DOCD, Diagnosis of chronic diseases. <sup>a</sup>SD, Standard deviation. \* T text.

11  
12 **264 Table 2 Distributions of characteristics of appropriateness admission under the subjective**  
13 **265 perception of patients**

| 15 Variable                                        | 16 elderly         |                          |                           |             | 17 non-elderly  |                          |                           |             |
|----------------------------------------------------|--------------------|--------------------------|---------------------------|-------------|-----------------|--------------------------|---------------------------|-------------|
|                                                    | 18 N<br>(column %) | Appropriate<br>N(line %) | Inappropriate<br>N(line%) | P-<br>value | N<br>(column %) | Appropriate<br>N(line %) | Inappropriate<br>N(line%) | P-<br>value |
| 19 RTDAR                                           |                    |                          |                           |             |                 |                          |                           |             |
| 20 No doubt                                        | 63(27.4)           | 90(56.3)                 | 70(43.8)                  | 0.119       | 160(37.9)       | 46(73.0)                 | 17(27.0)                  | 0.007       |
| 21 Doubt                                           | 17(7.4)            | 16(59.3)                 | 11(40.7)                  |             | 27(6.4)         | 16(94.1)                 | 1(5.9)                    |             |
| 22 Expected                                        | 124(53.9)          | 124(65.3)                | 66(34.7)                  |             | 190(45.0)       | 84(67.7)                 | 40(32.3)                  |             |
| 23 Family requirements                             | 13(5.7)            | 8(80.0)                  | 2 ( 20.0 )                |             | 10(2.4)         | 8(61.5)                  | 5(38.5)                   |             |
| 24 Others                                          | 13(5.7)            | 12(34.3)                 | 23(65.7)                  |             | 35(8.3)         | 7(53.8)                  | 6(46.2)                   |             |
| 25 Disease severity                                |                    |                          |                           |             |                 |                          |                           |             |
| 26 Light                                           | 8(3.5)             | 39(58.2)                 | 28(41.8)                  | 0.546       | 67(15.9)        | 7(87.5)                  | 1(12.5)                   | 0.697       |
| 27 General                                         | 46(20.0)           | 63(56.3)                 | 49(43.8)                  |             | 112(26.5)       | 32(69.6)                 | 14(30.4)                  |             |
| 28 Serious                                         | 176(76.5)          | 148(60.9)                | 95(39.1)                  |             | 243(57.6)       | 122(69.3)                | 54(30.7)                  |             |
| 29 Comparison of R <sub>0</sub> and R <sub>1</sub> |                    |                          |                           |             |                 |                          |                           |             |
| 30 R <sub>0</sub> >R <sub>1</sub>                  | 62(27.0)           | 37(80.4)                 | 9(19.6)                   | 0.003       | 46(10.9)        | 54(87.1)                 | 8(12.9)                   | 0.003       |
| 31 R <sub>1</sub> >R <sub>0</sub>                  | 101(43.9)          | 101(53.2)                | 89(46.8)                  |             | 190(45.0)       | 64(56.1)                 | 37(43.9)                  |             |
| 32 Unknown                                         | 67(29.1)           | 112(60.2)                | 74(39.8)                  |             | 186(44.1)       | 43(70.9)                 | 24(29.1)                  |             |
| 33 Affordability                                   |                    |                          |                           |             |                 |                          |                           |             |
| 34 Difficult                                       | 73(31.7)           | 37(61.7)                 | 23(38.3)                  | 0.009       | 60(14.2)        | 61(83.6)                 | 12(16.4)                  | 0.842       |
| 35 Reluctantly                                     | 83(36.1)           | 124(57.9)                | 90(42.1)                  |             | 214(50.7)       | 54(65.1)                 | 29(34.9)                  |             |
| 36 Fully payable                                   | 74(32.2)           | 89(60.1)                 | 59(39.9)                  |             | 148(35.1)       | 46(62.2)                 | 28(37.8)                  |             |
| 37 Hospitalisation                                 |                    |                          |                           |             |                 |                          |                           |             |
| 38 convenience                                     |                    |                          |                           |             |                 |                          |                           |             |
| 39 Yes                                             | 116(50.4)          | 169(60.8)                | 109(39.2)                 | 0.085       | 278(65.9)       | 75(64.7)                 | 41(35.3)                  | 0.368       |
| 40 No                                              | 114(49.6)          | 81(56.3)                 | 63(43.8)                  |             | 144(34.1)       | 86(75.4)                 | 28(24.6)                  |             |

41 Note: RTDAR, Response to Doctor's Admission Requirement.

42 RO, Reimbursement of Outpatient; RI, Reimbursement of Inpatient.

43 **266 Determinants of inappropriate admission to hospital for elderly people**

44 **267 Logistic regression based on the interaction of age (elderly and non-elderly group) and**

45 **268 other factors shows that the interaction between age and gender and between age and**

1  
2  
3  
4 269 chronic disease both had influence on patients' inappropriate admission to hospital  
5  
6  
7 270 (table3). Compared with non-elderly, the risk of inappropriate admission of female  
8  
9 271 elderly was lower (OR=0.33, 95%CI: 0.15-0.73), and elderly with chronic disease were  
10  
11  
12 272 more likely to be inappropriately admitted to hospital (OR=3.33, 95%CI: 1.23 -9.04).  
13  
14  
15  
16  
17  
18  
19  
20  
21  
22  
23  
24  
25  
26  
27  
28  
29  
30  
31  
32  
33  
34  
35  
36  
37  
38  
39  
40  
41  
42  
43  
44  
45  
46  
47  
48  
49  
50  
51  
52  
53  
54  
55  
56  
57  
58  
59  
60

For peer review only

273 **Table 3 Logistic regression analysis based on the interaction of age and other factors (n=652)**

| Variable                                   | COR(95%CI)         | AOR(95%CI) †        | Variable                                                                               | COR(95%CI)         | AOR(95%CI) †       |
|--------------------------------------------|--------------------|---------------------|----------------------------------------------------------------------------------------|--------------------|--------------------|
| County(ref:Yilong) **                      |                    |                     | Health status(ref:Good)                                                                |                    |                    |
| Huining                                    | 1.04(0.62 to 1.72) | 1.29(0.68 to 2.44)  | General                                                                                | 0.68(0.47 to 0.98) | 0.82(0.50 to 1.33) |
| Dingyuan                                   | 4.03(2.52 to 6.43) | 5.99(3.08 to 11.68) | Poor                                                                                   | 0.57(0.27 to 1.22) | 0.83(0.33 to 2.06) |
| Weiyuan                                    | 1.16(0.99 to 2.61) | 1.85(0.98 to 3.48)  | RTDAR(ref:No doubt)#                                                                   |                    |                    |
| Age(ref: non-elderly) **                   | 0.62(0.44 to 0.88) | 1.35(0.59 to 3.10)  | Doubt                                                                                  | 0.59(0.29 to 1.20) | 0.6(0.26 to 1.39)  |
| Gender(ref: male)*                         | 1.01(0.74 to 1.39) | 1.64(1.03 to 2.63)  | Expected                                                                               | 0.80(0.56 to 1.14) | 0.82(0.53 to 1.27) |
| Disease category(ref:Circulatory disease)# |                    |                     | Family requirements                                                                    | 0.68(0.27 to 1.73) | 0.73(0.25 to 2.09) |
| Respiratory disease                        | 1.02(0.61 to 1.71) | 0.83(0.43 to 1.58)  | Others                                                                                 | 2.39(1.26 to 4.52) | 1.91(0.89 to 4.09) |
| Digestive disease                          | 1.46(0.86 to 2.48) | 2.84(1.44 to 5.58)  | Disease severity(ref:Light)                                                            |                    |                    |
| Urinary disease                            | 0.60(0.23 to 1.58) | 1.04(0.32 to 3.39)  | General                                                                                | 1.05(0.60 to 1.85) | 1.05(0.51 to 2.15) |
| Endocrinology diseases                     | 1.81(0.56 to 2.51) | 1.43(0.60 to 3.45)  | Serious                                                                                | 0.88(0.53 to 1.45) | 1.28(0.66 to 2.50) |
| Bones and muscles                          | 2.08(0.87 to 4.98) | 1.45(0.52 to 4.06)  | Comparison of R <sub>0</sub> and R <sub>1</sub> (ref:R <sub>0</sub> >R <sub>1</sub> )# |                    |                    |
| Injury and poisoning                       | 0.20(0.06 to 0.67) | 0.99(0.24 to 4.13)  | R <sub>1</sub> <R <sub>0</sub>                                                         | 4.09(2.32 to 7.21) | 2.13(1.08 to 4.21) |
| Symptoms and signs                         | 1.33(0.81 to 2.18) | 1.63(0.91 to 2.93)  | Unknown                                                                                | 3.38(1.90 to 6.02) | 1.62(0.80 to 3.27) |
| Others                                     | 1.57(0.90 to 2.73) | 1.30(0.64 to 2.64)  | Affordability(ref:Difficult) **                                                        |                    |                    |
| Department(ref:Internal medicine) **       |                    |                     | Reluctantly                                                                            | 1.87(1.19 to 2.94) | 1.14(0.66 to 1.96) |
| Surgery                                    | 0.32(0.17 to 0.58) | 0.11(0.05 to 0.25)  | Fully payable                                                                          | 1.80(1.13 to 2.89) | 1.84(1.05 to 3.24) |
| Pediatric                                  | 3.28(2.20 to 4.88) | 4.26(1.94 to 9.35)  | Hospitalisation convenience(ref:Yes)                                                   | 0.89(0.64 to 1.23) | 1.25(0.84 to 1.88) |
| Others                                     | 1.17(0.67 to 2.05) | 1.16(0.59 to 2.29)  | Age×Gender (ref:non-elderly×male)**                                                    | 0.53(0.34 to 0.82) | 0.33(0.15 to 0.73) |
| DOCD(ref:No) **                            | 1.40(1.02 to 1.93) | 0.32(0.16 to 0.65)  | Age×DOCD(ref:non-elderly×No)*                                                          | 0.55(0.30 to 1.02) | 3.33(1.23 to 9.04) |

Note: #Univariate regression analysis  $p < 0.05$ , \*Logistic Regression Analysis  $p < 0.05$   
†Adjusted for all other covariates listed in the table

---

AOR, adjusted OR; COR, crude OR.

For peer review only

1  
2  
3  
4  
5  
6  
7  
8  
9  
10  
11  
12  
13  
14  
15  
16  
17  
18  
19  
20  
21  
22  
23  
24  
25  
26  
27  
28  
29  
30  
31  
32  
33  
34  
35  
36  
37  
38  
39  
40  
41  
42  
43  
44  
45  
46

275 The results of the binary logistic regression for elderly patients are shown in Table 4.  
 276 Taking Yilong as the reference group, rural elderly patients in Dingyuan had a higher  
 277 risk of inappropriate admission to hospital (OR=9.74, 95%CI: 3.30-28.41). A higher  
 278 age corresponds to a lower possibility of inappropriate admission (OR=0.94, 95%CI:  
 279 0.90-0.99). Elderly people in the surgery department are less likely to be admitted to  
 280 hospital inappropriately (OR=0.21, 95%CI: 0.07-0.61). For the subjective cognition of  
 281 elderly patients, our study showed that only patients who have doubts about the doctor's  
 282 admission requirement but decided to be hospitalised after communication with the  
 283 doctor were the least likely to be admitted inappropriately (OR=0.07, 95%CI:0.01-0.76).

284 **Table 4 logistic regression analysis of inappropriate admission of elderly (n = 230)**

| Variable                            | COR(95%CI)          | AOR(95%CI) †        |
|-------------------------------------|---------------------|---------------------|
| County(ref: Yilong)*                |                     |                     |
| Huining                             | 1.60(0.63 to 4.06)  | 0.67(0.21 to 2.07)  |
| Dingyuan                            | 6.33(2.63 to 15.25) | 9.74(3.30 to 28.41) |
| Weiyuan                             | 3.21(1.29 to 7.98)  | 3.36(1.08 to 10.46) |
| Age(years) *                        | 0.99(0.95 to 1.03)  | 0.94(0.90 to 0.99)  |
| Gender (ref: male)*                 | 0.64(0.36 to 1.14)  | 0.49(0.25 to 2.98)  |
| Department (ref:internal medicine)* |                     |                     |
| Surgery                             | 0.47(0.18 to 1.20)  | 0.21(0.07 to 0.61)  |
| Others                              | 1.65(0.55 to 4.96)  | 1.49(0.35 to 6.27)  |
| RTDAR (ref: No doubt)*              |                     |                     |
| Doubt                               | 0.17(0.02 to 1.38)  | 0.07(0.01 to 0.76)  |
| Expected                            | 1.29(0.66 to 2.52)  | 0.87(0.39 to 1.96)  |
| Family requirements                 | 1.69(0.49 to 5.89)  | 1.48(0.34 to 6.34)  |
| Others                              | 2.32(0.68 to 7.89)  | 4.14(0.94 to 18.24) |
| Affordability(ref: difficult)#      |                     |                     |
| Reluctantly                         | 2.73(1.27 to 5.87)  | 1.69(0.68 to 4.20)  |
| Complete                            | 3.09(1.42 to 6.73)  | 2.84(1.13 to 7.17)  |

Note: forward stepwise :  $\alpha_{\text{entry}}=0.1$  ,  $\alpha_{\text{removal}}=0.15$

#Univariate regression analysis  $p<0.05$  , \*Logistic Regression Analysis  $p<0.05$

†Adjusted for all other covariates listed in the table

---

AOR, adjusted OR; COR, crude OR.

285

## 286 **Discussion**

287 By the descriptive analysis and logistic regression analysis, we studied the  
288 characteristic and determinants of inappropriate admission of elderly people in rural  
289 China. According to our results, we would try to find out the reasons for the  
290 inappropriate admission of the elderly people in rural China from the perspective of  
291 supply and demand by discussing the determinant factors of it. And our study would  
292 also try to give some suggestions for the Chinese government to control the  
293 inappropriate admission of the elderly, and provide the new observations for  
294 researchers in this field.

### 295 *Inappropriate admission of elderly in rural China*

296 In this study, the inappropriate admission rate of patients over 60 year old in rural areas  
297 in China is 30%, which is generally higher than that reported of 27% in the UK [18],  
298 9.8% in Italy<sup>[14]</sup>, 9.2% in Switzerland<sup>[19]</sup> and 8.8% in France<sup>[13]</sup>. Yan et al.<sup>[20]</sup> found that  
299 the inappropriate admission rate of patients over 60 years in rural areas in China was  
300 14.3%, which was also lower than the results of this study. This result may be attributed  
301 to the differences among the studies with regard to health service system, geographical  
302 environment or study period. These studies were mainly concerned on elderly people  
303 of different age groups and in different admission departments. The inappropriate  
304 admission rate of elderly patients (30%) was lower than that of non-elderly patients  
305 (40.8%) probably because the body functions of elderly patients are worse than those

1  
2  
3  
4 306 of non-elderly patients. Moreover, an elderly person presents more obvious and serious  
5  
6 307 symptoms at the onset of a disease and is thus less likely to be inappropriately admitted.  
7  
8

9 308 ***Characteristics of elderly patients who were hospitalised inappropriately***

10  
11 309 Significant differences were found in the distribution of inappropriate admission among  
12  
13  
14 310 elderly patients across different counties. Among the four surveyed areas, Dingyuan  
15  
16  
17 311 had the highest rate of inappropriate admission, whereas Yilong has the lowest. It may  
18  
19 312 be related to the differences in health policies, geographical environment and customs  
20  
21  
22 313 between the counties. Elderly patients who affords the hospitalisation costs difficult had  
23  
24 314 the lowest inappropriate admission rate. It may be caused by economic difficulties that  
25  
26  
27 315 restrict the utilization of health services for elderly patients in rural areas in China [21].  
28  
29  
30 316 Our research proves that elderly people who have a correct understanding of medical  
31  
32 317 insurance reimbursement have higher inappropriate admission rates, probably because  
33  
34  
35 318 the medical insurance reimbursement policy has promoted the excessive release of  
36  
37  
38 319 hospitalisation services demand for elderly patients [22].  
39

40 320 ***Determinants of inappropriate admission for elderly people***

41  
42  
43 321 Gender and chronic diseases are the specific factors affecting the inappropriate  
44  
45 322 admission of elderly people. Compared with non-elderly patients, the tendency of  
46  
47  
48 323 female elderly patients for inappropriate hospitalisation was less obvious. Moreover,  
49  
50  
51 324 the risk of inappropriate admission of elderly patients with chronic disease was higher,  
52  
53 325 which is consistent with the findings of Gamper, probably because relative to non-  
54  
55  
56 326 elderly people, elderly people are less aware of the disease. Moreover, a perfect chronic  
57  
58  
59 327 disease management is lacking in rural areas in China. When the symptoms of chronic  
60



1  
2  
3  
4 328 diseases appear, it is easier for elderly earlier to misjudge the disease and blindly choose  
5  
6  
7 329 to be admitted to a hospital.

8  
9 330 The logistic regression shows that the risk of inappropriate admission varies across  
10  
11 331 different counties in China's rural areas. The health policy in different counties,  
12  
13  
14 332 especially the medical insurance policy, plays a key role in the inappropriate admission  
15  
16  
17 333 of elderly patients (the NRCMS reimbursement policies in the survey areas in 2017 was  
18  
19 334 shown in additional file 2). A large gap exists between the outpatient and hospitalisation  
20  
21  
22 335 compensation in the survey area. Especially at county-level hospitals, the general  
23  
24  
25 336 outpatient reimbursement is not covered, hence, elderly people in rural areas prefer  
26  
27  
28 337 hospitalisation and get more medical expense reimbursement. Dingyuan has the highest  
29  
30 338 risk of inappropriate admission for elderly patients, which may be caused by its high  
31  
32  
33 339 level of reimbursement policy of the NRCMS. In 2017, the reimbursement ratio of  
34  
35 340 NRCMS in Dingyuan county-level hospital was 85%, and the annual payment  
36  
37  
38 341 limitation of each inpatient could reach 200 thousand RMB, which was higher than that  
39  
40  
41 342 of Yilong and Weiyuan. Although the reimbursement ratio of NRCMS and the annual  
42  
43  
44 343 payment limitation of each inpatient in Yilong are higher than that of Weiyuan, the risk  
45  
46  
47 344 of inappropriate admission of elderly patients in Weiyuan was higher, may be because  
48  
49  
50 345 the greater impact of its geographical environment. Yilong is located in low hills and  
51  
52  
53 346 has a convenient mode of transportation, whereas Weiyuan is located in high  
54  
55  
56 347 mountainous area, where the terrain is complex and the traffic is inconvenient, which  
57  
58  
59 348 make it more difficult for elderly patients to travel and make them choose to be admitted  
60  
349 for treatment convenience<sup>[23]</sup>.

1  
2  
3  
4 350 Gender and age also had an impact on the inappropriate admission of elderly people in  
5  
6 351 rural areas in China. Compared with female elderly patients, the inappropriate  
7  
8  
9 352 admission tendency of male elderly patients is more obvious. This observation is  
10  
11 353 probably caused male patients by the generally higher status in the family and society  
12  
13  
14 354 of male elderly patients than females <sup>[24]</sup>, and their health status receives more attention,  
15  
16  
17 355 which makes them willing to use hospitalisation to ensure the treatment effect and  
18  
19 356 resulting in inappropriate admission. With increasing age, elderly patients are less likely  
20  
21  
22 357 to be admitted inappropriately. This result is consistent with that of other studies <sup>[25]</sup>.  
23  
24  
25 358 The reason is mainly because older patients have severely reduced their body functions,  
26  
27 359 and their disease are more serious; hence, inappropriate admission is relatively rare.  
28  
29  
30 360 The department was also a key factor in the inappropriate admission of elderly patients.  
31  
32 361 Compared with surgery, medical patients are more prone to inappropriate admissions  
33  
34  
35 362 (the inappropriate admission rate of 31.3%), which is consistent with the results of  
36  
37  
38 363 Ferrero <sup>[26]</sup>. This observation might be caused by two reasons: On the one hand, many  
39  
40 364 surgical-related indicators are included in the original evaluation indicators in AEP <sup>[27]</sup>,  
41  
42  
43 365 which improves the rationality of surgical patient admission. On the other hand, most  
44  
45 366 elderly patients suffer from chronic diseases, making internal medicine departments  
46  
47  
48 367 easily selected for treatment. However, the performance appraisal of Chinese hospital  
49  
50 368 is always directly linked to departmental income. However, the internal medicine  
51  
52  
53 369 income is significantly lower than that of surgery, which causes physicians to produce  
54  
55  
56 370 a more induced demand in pursuit of departmental income <sup>[28]</sup>. In addition, the hospital  
57  
58  
59 371 lacks admission standards for the severity of the disease, and the intensity of medical  
60

1  
2  
3  
4 372 services required. These factors have increased the possibility of inappropriate  
5  
6  
7 373 admission to the elderly.

8  
9 374 The response of rural elderly patients to hospital admission requirements directly  
10  
11 375 affects the appropriateness of admission. Elderly patients who had doubts about the  
12  
13  
14 376 doctor's admission requirements and communicated with the doctor before deciding to  
15  
16  
17 377 enter the hospital have a significantly less possibility of being admitted inappropriately.

18  
19 378 The influence of this factor on the appropriateness of hospitalisation in rural elderly is  
20  
21  
22 379 mainly reflected in two points. Firstly, Chinese rural areas have not established a perfect  
23  
24  
25 380 'family doctor first' consultation mechanism, and rural elderly patients lack the guidance  
26  
27  
28 381 of the first diagnosis and the correct understanding of their disease. Cultural degree is  
29  
30 382 low especially for the elderly patients in rural areas in China, which makes their  
31  
32  
33 383 judgment of the disease entirely dependent on the clinician. For doctors' admission  
34  
35  
36 384 requirements, if elderly patients communicate with doctors effectively, understand their  
37  
38  
39 385 own disease condition and make admission decisions accordingly, inappropriate  
40  
41  
42 386 admission tendency of elderly patients is significantly reduced. Secondly, the doctor's  
43  
44  
45 387 request for admission to the patient is not only based on the judgment of the patient's  
46  
47  
48 388 basic condition but also with the factors of medical accident risk aversion, departmental  
49  
50  
51 389 income, etc<sup>[29,30]</sup>. Clinical decision-making of doctors under various factors meets the  
52  
53  
54 390 appropriate admission requirements of elderly patients becomes a key point affecting  
55  
56  
57 391 the rationality of patients' admission, which was proved by Aida bianco and Mytton.

## 392 **Conclusion**

393 In this study, the rate of inappropriate admissions of elderly patients in county-level  
394 hospitals from rural China was high. We found that chronic diseases was the specific  
395 factor and county, department and the response to the doctor's admission requirements  
396 were the determinants of the inappropriate admission of elderly patients. We believe  
397 that these factors are closely related to the management of chronic diseases to elderly,  
398 regional health policies (especially the NRCMS), department management, and family  
399 doctor service in rural China. Therefore, this study suggests that the government can  
400 control the inappropriate admission of the elderly from the following points.1) the  
401 NRCMS management department should adjust the reimbursement ratio of  
402 hospitalisation and outpatient according to actual inspections and increase the ratio of  
403 outpatient reimbursement to a certain extent, reducing unnecessary hospitalisation  
404 needs. 2) hospital department needs to establish a performance appraisal system with  
405 medical quality and patient satisfaction as the core, and admission criteria for the  
406 severity of the disease and the intensity of required medical services should also be  
407 established. 3) To improve elderly patients' cognition of the disease, China's rural areas  
408 need to establish a family doctor service based on the concept of health management  
409 <sup>[31]</sup>, and provide medical consultation and guidance for elderly patients.

## 410 **Limitation**

411 This study has two limitations. Firstly, the cross-sectional study design could not  
412 determine the causal relationship between unreasonable admission and related factors  
413 in elderly patients. Secondly, no unified identification standard exists for the

1  
2  
3  
4 414 inappropriate admission of elderly patients in the current studies [32], making the  
5  
6 415 identification of inappropriate admission dependent on the AEP. The AEP applicable  
7  
8  
9 416 to the entire population may not be the best tool for evaluating the inappropriate  
10  
11 417 admission of elderly patients [17, 33-35].  
12  
13

## 14 418 **Competing interests**

15  
16  
17 419 The authors declare no competing interests.  
18  
19

## 20 420 **Authors' contributions**

21  
22 421 X-M.H, H-X.G and Y.Z participated in the conception and design of the manuscript.  
23  
24  
25 422 X-M.H and H-X.G contributed equally to the development of this research study. Y.Z,  
26  
27  
28 423 H-M.L, D.S, J-J.C, S-H.L and D.J participated in the data collection and statistical  
29  
30 424 analysis. Y-C.C helped draft, review and revise the manuscript. All authors gave their  
31  
32  
33 425 approval to publish this version of the manuscript.  
34  
35

## 36 426 **Funding statement**

37  
38 427 This research is supported by the National Natural Science Foundation of China  
39  
40  
41 428 (Grant No.: 71473096).  
42

## 43 429 **Disclosure**

44  
45  
46 430 This work has never been published or presented at any time in the past.  
47  
48

## 49 431 **Provenance and peer review**

50  
51  
52 432 This work is not commissioned and is externally peer reviewed.  
53

## 54 433 **Data sharing statement**

55  
56  
57 434 The anonymised dataset can be requested by sending an email to the corresponding  
58  
59  
60

435 author.

## Reference:

- 436
- 437 1. National Bureau of Statistics of China. Statistical Communiqué of the People's Republic of China  
438 on the 2017 National Economic and Social Development [N]. China Information Daily, 2018-03-  
439 01 (003).
- 440 2. Center for Health Statistics and Information. An Analysis Report of National Health Services  
441 Survey in China, 2013 [M]. Peking Union Medical College Press, 2015.
- 442 3. Xiaona Gao, Yingchun Chen, Zhaoqun Chu, Lijing Zhang. Analysis of characteristic excessive  
443 demand for elderly inpatient service and causes covered by NRCMS [J]. Chinese Journal of  
444 Hospital Administration, 2015(4):279-282. 'doi': 10.3760/cma.j.issn.1000-6672.2015.04.011
- 445 4. Lavis, J.N.; Anderson, G.M. Appropriateness in health care delivery: Definitions, measurement and  
446 policy implications. *CAN MED ASSOC J* **1996**, 154, 321-328.
- 447 5. Payne, S.M. Identifying and managing inappropriate hospital utilization: a policy synthesis.  
448 *HEALTH SERV RES* **1987**, 22, 709-769.
- 449 6. Campbell, J. Inappropriate admissions: thoughts of patients and referring doctors. *J R Soc Med* **2001**,  
450 94, 628-631. 'doi': 10.1177/014107680109401206
- 451 7. World Health Organization. China country assessment report on ageing and health [R].2016.
- 452 8. Jinghong Chen. Research on Demand an Utilization of Health Service among the Elderly in Rural  
453 Areas under the Background of Ageing[D] Peking Union Medical College,2012.
- 454 9. XIE Chun-yan, HU Shan-lian, SUN Guo-zhen, et al. Exploration and Experience of Provider  
455 Payment System Reform in China [J]. Chinese Health Economics, ,2010,29(05):27-29.  
456 'doi':10.3969/j.issn.1003-0743.2010.05.008
- 457 10. Creditor M C. Hazards of hospitalization of the elderly[J]. Annals of Internal Medicine, 1993,  
458 118(3):219-223. 'doi': 10.7326/0003-4819-118-3-199302010-00011
- 459 11. Fusco M, Buja A, Piergentili P, et al. Individual and hospital-related determinants of potentially  
460 inappropriate admissions emerging from administrative records.[J]. Health Policy, 2016,  
461 'doi':120(11):1304-1312. 10.1016/j.healthpol.2016.09.015
- 462 12. Gamper G, Wiedermann W, Barisonzo R, et al. Inappropriate hospital admission: interaction  
463 between patient age and co-morbidity[J]. Internal & Emergency Medicine, 2011, 6(4):361-367.  
464 'doi':10.1007/s11739-011-0629-0
- 465 13. Menand E, Lenain E, Lazarovici C, et al. French multicenter evaluation of the appropriateness of  
466 admission to the emergency department of the over-80s[J]. Journal of Nutrition Health & Aging,  
467 2015, 19(6):1-7. 'doi':10.1007/s12603-015-0489-9
- 468 14. Bianco A, Pileggi C, Rizza P, et al. An assessment of inappropriate hospital bed utilization by  
469 elderly patients in southern Italy[J]. Aging Clinical & Experimental Research, 2006, 18(3):249-  
470 256. 'doi':10.1007/BF03324656
- 471 15. Mytton O T, Oliver D, Mirza N, et al. Avoidable acute hospital admissions in older people[J].  
472 British Journal of Health Care Management, 2013, 18(11):597-603.  
473 'doi':10.12968/bjhc.2012.18.11.597
- 474 16. Gertman P M, Restuccia J D. The appropriateness evaluation protocol: a technique for assessing  
475 unnecessary days of hospital care.[J]. Medical Care, 1981, 19(8):855-71. 'doi':10.1097/00005650-  
476 198108000-00005

- 1  
2  
3  
4 477 17. Yingchun Chen, Excessive demand for inpatient service in rural areas [M]. 科学出版社, 2014.
- 5  
6 478 18. Leah V, Adams J. Assessment of older adults in the emergency department.[J]. Nursing Standard,  
7 479 2010, 24(46):42. 'doi': 10.7748/ns2010.07.24.46.42.c7911
- 8  
9 480 19. Ingold B B, Yersin B, Wietlisbach V, et al. Characteristics associated with inappropriate hospital  
10 481 use in elderly patients admitted to a general internal medicine service[J]. Aging Clinical &  
11 482 Experimental Research, 2000, 12(6):430-438. 'doi':10.1007/BF03339873
- 12  
13 483 20. Zhang, Y., et al., Determinants of Inappropriate Admissions in County Hospitals in Rural China: A  
14 484 Cross-Sectional Study. Int J Environ Res Public Health, 2018. 15(6). 'doi':10.3390/ijerph15061050
- 15  
16 485 21. CHEN Fang-wu, YANG Xu-li, LIU Jie. Analysis on the situation of health service utilization and  
17 486 its influencing factors among aged people[J].Modern Preventive Medicine,2007(16):3083-3085.  
18 487 'doi':10.3969/j.issn.1003-8507.2007.16.037
- 19  
20 488 22. HU HONG-Wei, LUAN Wen-jing, LI Jia-yi. Medical insurance, health Services Utilization and  
21 489 Excessive Demands for Medical Services——The Impact of Medical Insurance on Utilization of  
22 490 Health Service of the elderly [J]. Journal of Shanxi Finance and Economics University,  
23 491 2015,37(05):14-24. 'doi':10.13781/j.cnki.1007-9556.2015.05.002
- 24  
25 492 23. Yan Z, Chen Y, Xiang Z, et al. Current level and determinants of inappropriate admissions to  
26 493 township hospitals under the new rural cooperative medical system in China: a cross-sectional  
27 494 study[J]. BMC Health Services Research, 2014, 14(1):649. 'doi':10.1186/s12913-014-0649-3
- 28  
29 495 24. TANG Yong-xia, LUO Wei-guo. Investigation on Family Status of Women in Poor Rural Areas—  
30 496 —With Tongwei County in Dingxi of Gansu as an Example [J]. Journal of University of Science  
31 497 and Technology Beijing (Social Sciences Edition), 2014, 30(4):46-55. 'doi':10.3969/j.issn.1008-  
32 498 2689.2014.04.007
- 33  
34 499 25. Tavakoli N, Hosseini Kasnavieh S M, Yasinzadeh M, et al. Evaluation of Appropriate and  
35 500 Inappropriate Admission and Hospitalization Days According to Appropriateness Evaluation  
36 501 Protocol (AEP).[J]. Archives of Iranian Medicine, 2015, 18(7):430-434.
- 37  
38 502 26. Ferrero, B.O.; Sanchez, M.L.; Corredera, R.C.; Uriarte, A.E.; de Miguel, D.L.V.F. Inappropriate  
39 503 admissions to the Department of Internal Medicine evaluated by the AEP (Appropriateness  
40 504 Evaluation Protocol). An Med Interna 1998, 15, 674-675.
- 41  
42 505 27. Mozes, B.; Schiff, E.; Modan, B. Factors affecting inappropriate hospital stay. Quality assurance in  
43 506 health care : the official journal of the International Society for Quality Assurance in Health Care  
44 507 1991, 3, 211-217. 'doi': 10.1093/intqhc/3.3.211
- 45  
46 508 28. Gan C H, Zhou X, Zheng R G. Imperfect Information, Supplier-induced Demand and Quality of  
47 509 Health Service[J]. Journal of Finance & Economics, 2007. 'doi':10.3969/j.issn.1001-  
48 510 9952.2007.08.009
- 49  
50 511 29. Yip, W.C.; Hsiao, W.; Meng, Q.; Chen, W.; Sun, X. Realignment of incentives for health-care  
51 512 providers in China. LANCET 2010, 375, 1120-1130. 'doi':10.1016/S0140-6736(10)60063-3
- 52  
53 513 30. Osinaike, B.B.; Olusanya, O. Inappropriate Intensive Care Unit admissions: Nigerian doctors'  
54 514 perception and attitude. NIGER J CLIN PRACT 2016, 19, 721-724. 'doi':10.4103/1119-  
55 515 3077.181354
- 56  
57 516 31. Purdy S, Griffin T. Reducing hospital admissions[J]. Bmj, 2008, 336(7634):4-5.  
58 517 'doi':10.1136/bmj.39394.402465.BE
- 59  
60 518 32. Thwaites R, Glasby J, Le M N, et al. Room for one more? A review of the literature on  
519 519 'inappropriate' admissions to hospital for older people in the English NHS.[J]. Health & Social Care

- 1  
2  
3 520 in the Community, 2017, 5(1):309-15. 'doi':10.1111/hsc.12281  
4 521 33. Sánchez-García S, Juárez-Cedillo T, Mould-Quevedo J F, et al. The hospital appropriateness  
5 522 evaluation protocol in elderly patients: a technique to evaluate admission and hospital stay[J].  
6 523 Scandinavian Journal of Caring Sciences, 2010, 22(2):306-313. 'doi':10.1111/j.1471-  
7 524 6712.2007.00528.x ·  
8  
9 525 34. Cardona-Morrell M, Jch K, Brabrand M, et al. What is inappropriate hospital use for elderly  
10 526 people near the end of life? A systematic review[J]. European Journal of Internal Medicine, 2017.  
11 527 'doi': 10.1016/j.ejim.2017.04.014  
12  
13 528 35. Liu W, Yuan S, Wei F, et al. Reliability and Validity of the Chinese Version Appropriateness  
14 529 Evaluation Protocol[J]. Plos One, 2015, 10(8):e0136498. 'doi': 10.1371/journal.pone.0136498  
15  
16 530  
17  
18 531  
19  
20  
21  
22  
23  
24  
25  
26  
27  
28  
29  
30  
31  
32  
33  
34  
35  
36  
37  
38  
39  
40  
41  
42  
43  
44  
45  
46  
47  
48  
49  
50  
51  
52  
53  
54  
55  
56  
57  
58  
59  
60

For peer review only



### Additional file 1 R-AEP criteria for county hospitalisation

#### A. Needed medical service

1. Need surgery or follow-up treatment within 24 hours: (1) local anesthesia or general anesthesia; and/or (2) instruments or other facilities that are only available for hospitalized patients (angiography, visceral biopsy)
2. Treatment with varying dosage or drug on a regular basis under direct medical supervision
3. Calculation of intake and output volume
4. Operation to be conducted on the following day in the operating room, detailed pre-operative consultation or evaluation on the day of admission
5. Main surgical incision and drainage nursing
6. Quarantined patients
7. Bedside electrocardiogram (ECG) monitoring or testing vital signs at least every 2 hours
8. Stopping (at least once every 8 hours) or continuing oxygen inhalation
9. Referral of post-operative recovery

#### B. Severity of illness

1. Continuous fever  $>38.0^{\circ}\text{C}$  for more than 5 days
2. Acute confusion (coma or adipsoria)
3. Severe anomaly in electrolyte or blood and vigor, showing the following situations: (1)  $\text{Na} < 123 \text{ mEq/L}$  or  $> 156 \text{ mEq/L}$ ; (2)  $\text{K} < 2.5 \text{ mEq/L}$  or  $> 6.0 \text{ mEq/L}$ ; (3)  $\text{HCO}_3 < 20 \text{ mEq/L}$  or  $> 36 \text{ mEq/L}$ ; and (4) arterial blood  $\text{pH} < 7.30$  or  $> 7.45$
4. Loss of sight or hearing for 48 hours
5. Loss of activity in any part of the body for 48 hours
6. Excretion disorder or absence of intestinal peristalsis in the past 24 hours
7. Active bleeding
8. Needing blood transfusion because of bleeding
9. Mental disorders caused by non-alcohol dependence
10. Viscera removal or surgical wound dehiscence
11. Pulse less than 50 times or greater than 140 times per minute
12. Abnormal blood pressure: systolic blood pressure  $< 90 \text{ mmHg}$  or  $> 200 \text{ mmHg}$  and/or diastolic blood pressure  $< 60 \text{ mmHg}$  or  $> 120 \text{ mmHg}$
13. Ventricular fibrillation or acute myocardial ischemia shown by electrocardiogram (ECG) report or course log
14. Acute blood disorder, severe medium-sized leukopenia, thrombocytopenia, leukocytosis, erythrocytosis, thrombocytosis or hemolysis-resulted symptoms
15. Progressive acute neurological disorders
16. Soft tissue injuries affecting basic self-care
17. Acute myocardial infarction or cerebrovascular accident (stroke)
18. Spinal cord lesions
19. Lung infection above 40% or leafy lesions according to X-ray examination
20. Hyperemesis or acute pain at acute attack by chronic diseases
21. Burns occurred in specific areas

**Additional file 2 NRCMS reimbursement policies in the survey areas in 2017**

| County   | R <sub>o</sub>     |          | R <sub>i</sub>     |     |         |                  |     |         | APL(RMB) |
|----------|--------------------|----------|--------------------|-----|---------|------------------|-----|---------|----------|
|          | township hospitals |          | township hospitals |     |         | county hospitals |     |         |          |
|          | RR                 | APL(RMB) | Deductible         | RR  | PL(RMB) | Deductible       | RR  | PL(RMB) |          |
| Yilong   | 60%                | 120      | 100                | 90% | -       | 400              | 75% | -       | 180000   |
| Huining  | 60%                | 300      | 150                | 90% | 3000    | 500              | 85% | 20000   | 80000    |
| Dingyuan | 45%                | 150      | 150                | 90% | -       | 620              | 85% | -       | 200000   |
| Weiyuan  | 90%                | 110      | 150                | 80% | 3000    | 500              | 70% | 15000   | 80000    |

Note: R<sub>o</sub>, Reimbursement of Outpatient; R<sub>i</sub>, Reimbursement of Inpatient.

RR, Reimbursement ratio; APL, Annual payment limitation; PL, payment limitation of each time.

**STROBE 2007 (v4) Statement—Checklist of items that should be included in reports of *cross-sectional studies***

| Section/Topic                | Item # | Recommendation                                                                                                                                                                       | Reported on page # |
|------------------------------|--------|--------------------------------------------------------------------------------------------------------------------------------------------------------------------------------------|--------------------|
| <b>Title and abstract</b>    | 1      | (a) Indicate the study's design with a commonly used term in the title or the abstract                                                                                               | 1                  |
|                              |        | (b) Provide in the abstract an informative and balanced summary of what was done and what was found                                                                                  | 2,3                |
| <b>Introduction</b>          |        |                                                                                                                                                                                      |                    |
| Background/rationale         | 2      | Explain the scientific background and rationale for the investigation being reported                                                                                                 | 4                  |
| Objectives                   | 3      | State specific objectives, including any prespecified hypotheses                                                                                                                     | 6                  |
| <b>Methods</b>               |        |                                                                                                                                                                                      |                    |
| Study design                 | 4      | Present key elements of study design early in the paper                                                                                                                              |                    |
| Setting                      | 5      | Describe the setting, locations, and relevant dates, including periods of recruitment, exposure, follow-up, and data collection                                                      | 6,7                |
| Participants                 | 6      | (a) Give the eligibility criteria, and the sources and methods of selection of participants                                                                                          | 6,7                |
| Variables                    | 7      | Clearly define all outcomes, exposures, predictors, potential confounders, and effect modifiers. Give diagnostic criteria, if applicable                                             | 8                  |
| Data sources/<br>measurement | 8*     | For each variable of interest, give sources of data and details of methods of assessment (measurement). Describe comparability of assessment methods if there is more than one group | 8,9,10             |
| Bias                         | 9      | Describe any efforts to address potential sources of bias                                                                                                                            |                    |
| Study size                   | 10     | Explain how the study size was arrived at                                                                                                                                            | 7                  |
| Quantitative variables       | 11     | Explain how quantitative variables were handled in the analyses. If applicable, describe which groupings were chosen and why                                                         | 9                  |
| Statistical methods          | 12     | (a) Describe all statistical methods, including those used to control for confounding                                                                                                | 9                  |
|                              |        | (b) Describe any methods used to examine subgroups and interactions                                                                                                                  | 9                  |
|                              |        | (c) Explain how missing data were addressed                                                                                                                                          |                    |
|                              |        | (d) If applicable, describe analytical methods taking account of sampling strategy                                                                                                   |                    |
|                              |        | (e) Describe any sensitivity analyses                                                                                                                                                |                    |
| <b>Results</b>               |        |                                                                                                                                                                                      |                    |

|                          |     |                                                                                                                                                                                                                                                                                                                                                                                                               |                      |
|--------------------------|-----|---------------------------------------------------------------------------------------------------------------------------------------------------------------------------------------------------------------------------------------------------------------------------------------------------------------------------------------------------------------------------------------------------------------|----------------------|
| Participants             | 13* | (a) Report numbers of individuals at each stage of study—eg numbers potentially eligible, examined for eligibility, confirmed eligible, included in the study, completing follow-up, and analysed<br>(b) Give reasons for non-participation at each stage<br>(c) Consider use of a flow diagram                                                                                                               | 11                   |
| Descriptive data         | 14* | (a) Give characteristics of study participants (eg demographic, clinical, social) and information on exposures and potential confounders<br>(b) Indicate number of participants with missing data for each variable of interest                                                                                                                                                                               | 12                   |
| Outcome data             | 15* | Report numbers of outcome events or summary measures                                                                                                                                                                                                                                                                                                                                                          | 11,12                |
| Main results             | 16  | (a) Give unadjusted estimates and, if applicable, confounder-adjusted estimates and their precision (eg, 95% confidence interval). Make clear which confounders were adjusted for and why they were included<br>(b) Report category boundaries when continuous variables were categorized<br>(c) If relevant, consider translating estimates of relative risk into absolute risk for a meaningful time period | 14,15,16<br>12,13,14 |
| Other analyses           | 17  | Report other analyses done—eg analyses of subgroups and interactions, and sensitivity analyses                                                                                                                                                                                                                                                                                                                | 14                   |
| <b>Discussion</b>        |     |                                                                                                                                                                                                                                                                                                                                                                                                               |                      |
| Key results              | 18  | Summarise key results with reference to study objectives                                                                                                                                                                                                                                                                                                                                                      | 17—21                |
| Limitations              | 19  | Discuss limitations of the study, taking into account sources of potential bias or imprecision. Discuss both direction and magnitude of any potential bias                                                                                                                                                                                                                                                    | 22                   |
| Interpretation           | 20  | Give a cautious overall interpretation of results considering objectives, limitations, multiplicity of analyses, results from similar studies, and other relevant evidence                                                                                                                                                                                                                                    | 17—21                |
| Generalisability         | 21  | Discuss the generalisability (external validity) of the study results                                                                                                                                                                                                                                                                                                                                         |                      |
| <b>Other information</b> |     |                                                                                                                                                                                                                                                                                                                                                                                                               |                      |
| Funding                  | 22  | Give the source of funding and the role of the funders for the present study and, if applicable, for the original study on which the present article is based                                                                                                                                                                                                                                                 | 23                   |

\*Give information separately for cases and controls in case-control studies and, if applicable, for exposed and unexposed groups in cohort and cross-sectional studies.

**Note:** An Explanation and Elaboration article discusses each checklist item and gives methodological background and published examples of transparent reporting. The STROBE checklist is best used in conjunction with this article (freely available on the Web sites of PLoS Medicine at <http://www.plosmedicine.org/>, Annals of Internal Medicine at <http://www.annals.org/>, and Epidemiology at <http://www.epidem.com/>). Information on the STROBE Initiative is available at [www.strobe-statement.org](http://www.strobe-statement.org).
